# Supplementary material for: The Low-Copy-Number Satellite DNAs of the Model Beetle Tribolium castaneum
Source: MDPI journal article supplement (doi:10.3390/genes14050999), 2023-04-28

A) TCSat37

TCSat37 subfamilies'  
identity (%) matrix

|             | TCSat37-330 | TCSat37-270 | TCSat37-211 |
|-------------|-------------|-------------|-------------|
| TCSat37-330 |             | 64.207%     | 65.254%     |
| TCSat37-270 | 64.207%     |             | 70.632%     |
| TCSat37-211 | 65.254%     | 70.632%     |             |

|             |                                                                                                      |                                                                                |     |     |     |     |     |     |     |     |  |
|-------------|------------------------------------------------------------------------------------------------------|--------------------------------------------------------------------------------|-----|-----|-----|-----|-----|-----|-----|-----|--|
|             | 10                                                                                                   | 20                                                                             | 30  | 40  | 50  | 60  | 70  | 80  | 90  | 100 |  |
| TCsat37-330 | .... .... .... .... .... .... .... .... .... .... .... ....                                          | AAAATTGGGGCGCGAAT---TAAACTTTAATTTCGAAACGAAACAAATTAACC-----TCGAACTTGAATGCA----- | 65  |     |     |     |     |     |     |     |  |
| TCsat37-270 | --.T.C.AA.....G.CCGT.T..T.....A..TA..CAA.TT.....G..ATCGAACT.TA.TT.C...ATG.GACAAATTTACCTTGAACCTGAATG  | 98                                                                             |     |     |     |     |     |     |     |     |  |
| TCsat37-211 | --.T.C.AA.....CCGT.T..G.....A..TA..CAA.TTT....G..AA-----TA.C.....ATA.-----                           | 67                                                                             |     |     |     |     |     |     |     |     |  |
|             | 110                                                                                                  | 120                                                                            | 130 | 140 | 150 | 160 | 170 | 180 | 190 | 200 |  |
| TCsat37-330 | --TTCAATTTAGCGGCCGGTTTATTATTTATTTAAATTTTAATTTACAAATTTAAATCAAATTTATGCACGTACTCGAAATAATTTGATTGCAATTAAGA | 163                                                                            |     |     |     |     |     |     |     |     |  |
| TCsat37-270 | CACG..C...CA.....A.....TG.....G.....T..A....T.....T..G                                               | 198                                                                            |     |     |     |     |     |     |     |     |  |
| TCsat37-211 | --.G..C...CA.....A.....-..TG.....T..A.....A.....CCG.G                                                | 164                                                                            |     |     |     |     |     |     |     |     |  |
|             | 210                                                                                                  | 220                                                                            | 230 | 240 | 250 | 260 | 270 | 280 | 290 | 300 |  |
| TCsat37-330 | GCCGGTTTACAGCAAACGA--ATTAAATTTAATTCGGA-TTAAAGAGTAATTTGTGCGTGTGCGTCTGTTTGTAAATTAATTATTAAATAAATTATTAA  | 260                                                                            |     |     |     |     |     |     |     |     |  |
| TCsat37-270 | .....T.....TT..A..T.....A.....A..G.....TTTC..TT-..AA..CAC-----                                       | 270                                                                            |     |     |     |     |     |     |     |     |  |
| TCsat37-211 | .....G..CTGG,-----TTTC..TT-..AA..CA-----                                                             | 211                                                                            |     |     |     |     |     |     |     |     |  |
|             | 310                                                                                                  | 320                                                                            | 330 | 340 | 350 | 360 | 370 |     |     |     |  |
| TCsat37-330 | ACTGCGACCGCAACCGCGACCGGACGACGAATTAATTTAAGTAATTTCTGTGCCGTGCCGTACACTTTTATTA                            | 332                                                                            |     |     |     |     |     |     |     |     |  |
| TCsat37-270 | -----                                                                                                | 270                                                                            |     |     |     |     |     |     |     |     |  |
| TCsat37-211 | -----                                                                                                | 211                                                                            |     |     |     |     |     |     |     |     |  |

B) TCSat38

TCSat38 dimeric HOR

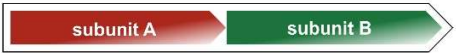

|                 |                                                                                                    |     |     |     |     |     |     |     |    |     |  |
|-----------------|----------------------------------------------------------------------------------------------------|-----|-----|-----|-----|-----|-----|-----|----|-----|--|
|                 | 10                                                                                                 | 20  | 30  | 40  | 50  | 60  | 70  | 80  | 90 | 100 |  |
| TCsat38subunitA | ATACCAAATCAAG-ATTTTTTGGCAAAGTTCCAATCAATACTTTTGAAACGAAATTTGCAAACATAAGACATTAAACAAAGCTATAATGGTACAAAAG | 99  |     |     |     |     |     |     |    |     |  |
| TCsat38subunitB | -.....-..T.A.....C.....C..T..T.....AC.....G...T.G..G.....G.G...T.....C.....T                       | 98  |     |     |     |     |     |     |    |     |  |
|                 | 110                                                                                                | 120 | 130 | 140 | 150 | 160 | 170 | 180 |    |     |  |
| TCsat38subunitA | CTCGTTTTRAAAGACAGTTCTGTTCAGCAGATATAATTTTTTGAATTTAA-TTGAGGCAAACCTAGGTTTTTGCTATCTGA                  | 179 |     |     |     |     |     |     |    |     |  |
| TCsat38subunitB | ..TA.....T.....CGA...G.A....CG.A.....G.....T...A.C.A.....T.....                                    | 179 |     |     |     |     |     |     |    |     |  |

C) TCSat18

TCSat18 monomer variants'  
identity (%) matrix

|            | TCSat18-73 | TCSat18-63 | TCSat18-82 |
|------------|------------|------------|------------|
| TCSat18-73 |            | 82.192%    | 75.610%    |
| TCSat18-63 | 82.192%    |            | 64.634%    |
| TCSat18-82 | 75.610%    | 64.634%    |            |

|            |             |                               |                                  |       |    |    |    |    |  |
|------------|-------------|-------------------------------|----------------------------------|-------|----|----|----|----|--|
|            | 10          | 20                            | 30                               | 40    | 50 | 60 | 70 | 80 |  |
| TCsat18-73 | TTGGCAACGT  | GTTTAAACACGTGTCCGCGCCATTTTTAA | ATTTAATTACCGATTTCGTGCGATTTTTTAGG | ----- | 73 |    |    |    |  |
| TCsat18-63 | .....G..... | T.....T.....                  | -----                            | 63    |    |    |    |    |  |
| TCsat18-82 | .....C..... | G.....G.C..                   | GTTTAAACACGTGTCCGCGCCATTTTTAA    | 82    |    |    |    |    |  |

#### D) TCsat15-1277 variant

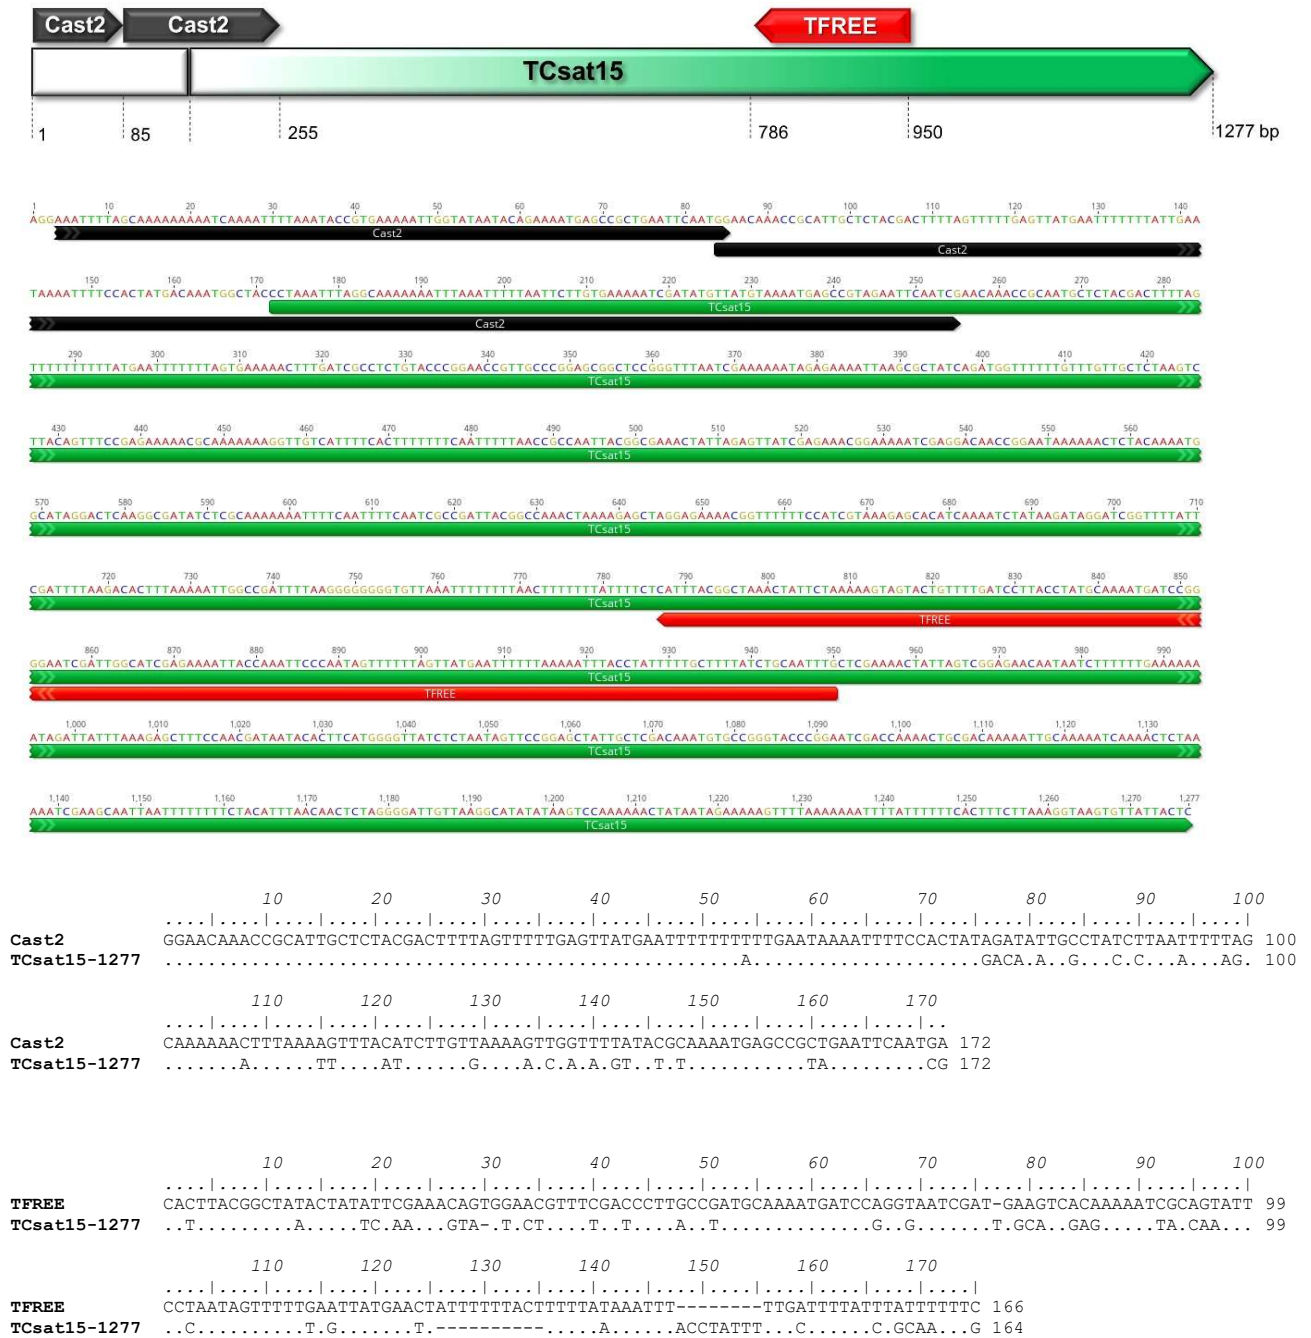

Supplement: s1 [file s1]
