# Supplementary material for: The Low-Copy-Number Satellite DNAs of the Model Beetle Tribolium castaneum
Source: MDPI journal article supplement (doi:10.3390/genes14050999), 2023-04-28
Supplement: s1 [file s1]

**Table S6.** Primers and PCR amplification conditions specific for satDNA TCsat12, TCsat13 and TCsat14.

|                                            | <b>TCsat12</b>        | <b>TCsat13</b>        | <b>TCsat14</b>       |
|--------------------------------------------|-----------------------|-----------------------|----------------------|
| <b>Forward primer</b>                      | AGAAAGTGGCACATTGTCGAT | ATTCAAATAAAGGGGGTAGTG | TTACAAACGGAACAGATGA  |
| <b>Reverse primer</b>                      | AAAAATCGAGCCCTGGGAAG  | TTGGGGTAGGAAATGAGAA   | TACAGGCTAAAATACACTTC |
| <b>Annealing temperature</b>               | 43°C                  | 46°C                  | 53°C                 |
| <b>The length of PCR amplified monomer</b> | 99 bp                 | 143 bp                | 107 bp               |
| <b>The length of PCR amplified dimer</b>   | 253 bp                | 409 bp                | 416 bp               |
| <b>The length of PCR amplified trimer</b>  | 407 bp                | 675 bp                | 725 bp               |
