# Supplementary material for: The Low-Copy-Number Satellite DNAs of the Model Beetle Tribolium castaneum
Source: MDPI journal article supplement (doi:10.3390/genes14050999), 2023-04-28
Supplement: s1 [file s1]

**Table S2.** Consensus sequences and GenBank accession numbers of the 46 *T. castaneum* satDNAs identified in this work.

| SatDNA         | Consensus sequence                                                                                                                                                                                                                                                                                                                                                                                                                                                                                                                                                                                                                                                                                                                                                                                                                                                                                                                                                                                                                                                                                                                                                           | GenBank Accession Number |
|----------------|------------------------------------------------------------------------------------------------------------------------------------------------------------------------------------------------------------------------------------------------------------------------------------------------------------------------------------------------------------------------------------------------------------------------------------------------------------------------------------------------------------------------------------------------------------------------------------------------------------------------------------------------------------------------------------------------------------------------------------------------------------------------------------------------------------------------------------------------------------------------------------------------------------------------------------------------------------------------------------------------------------------------------------------------------------------------------------------------------------------------------------------------------------------------------|--------------------------|
| <b>TCsat12</b> | TCAAAAATTATAAACAATACAACCTTTCCAACCCCTTCCCAGGGCTCGATTTTTTTTAAACTTTTTTATAATGTAGAGTATTAATGCTCTTT<br>CGACCTGCCGTAACAAGAAAGTGGCACATTGTGCATAACACATAGAAAAAAATAAAAACCA                                                                                                                                                                                                                                                                                                                                                                                                                                                                                                                                                                                                                                                                                                                                                                                                                                                                                                                                                                                                                | OQ551416                 |
| <b>TCsat13</b> | GTTATAGTAGGGAAGCTCAGGATCAATTTAAAATTATTTTCAGAAATTTTTCTCATTTCTACCCCAAACCTTATAGGGGTAAATTTGGCC<br>AAAAATTTGAAAATCTTTATTTACATTTCGGATCGAGTTTCGTTTTTTGTACATGGGTACCCTCTATGGTCCTGATTATGCTCCAGCAATCAA<br>ATTTGACATATTCAAATAAAGGGGGTAGTGGGGAATTTAAATGTCAAAATTCAAAAAAATTAATAATCAACCAATTAATATAT                                                                                                                                                                                                                                                                                                                                                                                                                                                                                                                                                                                                                                                                                                                                                                                                                                                                                           | OQ551417                 |
| <b>TCsat14</b> | TTACAAAACGCAATAAAGCAGAAGTGAGTATATGTTGACACCAAGTCTTTTTTGTATTATGAAGTGATTTTAGCCTGTAAGCGTTGAAAA<br>TGTCGAGGAACTGTTGCACCTAAAGCATGGGAAAACAAGGTATTTATTTTACTTGAAGTGAATTTTGTGATAATTTCCACAAAAAAA<br>GTGTGGTTCAGTTCTAAATATTTTACAATAATTTAACTTTTTTAGGCTACATCTTCCAAGAAGGAAAACTAAAGTACCACCTGCTGAAC<br>CAGCTGAAGTTACAAACGGAACAGATGAAAAAAA                                                                                                                                                                                                                                                                                                                                                                                                                                                                                                                                                                                                                                                                                                                                                                                                                                                     | OQ551418                 |
| <b>TCsat15</b> | AGGAAATTTTAGCAAAAAAATTGAAAATTTTAAATCTCGTGAAAAGTTGGTATAATACAGAAAATGAGCCGCTGAATTCAATGGAACAAAC<br>CGCATTGCTCTACGACTTTTAGTTTTTTTTTTATGAATTTTTTTAGTGAAAAAATTTGATCGCCTCTGTAGCCGGAACCGTTGCCCGGAGC<br>GGCTCCGGGTTTGGTCGAAAAATAGATAAAATTAAGCGCTATCAGATGGTTTTTTGTTGCTGCTCTAAGTCTTACAGTTTCCGAGAAA<br>AACGCAAAAAAAGGTTTCCATTTTCATTTTTTTCAATTTTCAACCGCAATTACGGCGAACTATTAGAGTTATCGAGAAACGGAAAAAT<br>GGAGGACAACCGGAATAAAAAACTCTACAAAATGGCATAGGACTCAAGGCGATATCTCGCAAAAAATTTTCAATTTTCAAACGCCGATT<br>ACGGCCAACTAAAAGAGCTAGGAGAAAACGCTTTTTTAGATCGGAAAGAGCACATCAAAATCTATAAGATAGAATCGGTTTTATTTGAT<br>TTTGAGACACTTTAAAAATTGACCGATTTTAAGGGGGGGGTGTTAACTTTTTTTAATTTTTTTTATTTTCTCATTTACGGCTAACTATTC<br>GAAAAAGTGGAAGTGTGTTGATCCATACCTATGCAAAATGATCCGGGAATCGATTGGCATCGAGAAAATTGCCAAATCCCAATAGTTT<br>TTTAGTTATGAATTTTTTAAAAATTTTACCAATTTTTTGCATTTATCTGCAATTTTGCAGAAAATTTAGTCGGAGAACAAATTTTTTTTGA<br>AAAAATAGATAATTTAAAGAGCTTTCCAACGATAATACACTTCATGGGGTTATCTCTGATAGTTCCGGAGCTATTGCTCGACAAATGTT<br>CCGGGTACCCAAAATCGACAAAAACTGCGACGAAAATTGAAAAATCAAACATCAAAAAATCGAACATATGGACTTTTTGTGGACTTTTA<br>ACAATTTTGTGGGTGTTAAGACATGTAGAAGTCCATAAAAATTTACTGGAGTGAGTTTAAAAAAAATTTTTTTTACCTCTTTGAAGTT<br>AAGTGTATTACTC | OQ551419                 |
| <b>TCsat16</b> | AAAATGGCAGCGGTCCAGCGGTTAATGTGCGTCAGAGTTAGGAAGACATTACGCAGTGTGACAATAATTGTACAGTAAATTCCTAATTT<br>AGGAATAATTTAGGGATTTACGTTGCATCGAAACCTTTCCGAACATGATAGCTTTAGTGACAGGGTGCCGCATTTTGGATATCCGAAT<br>AGGAGGGAATCTAATAATATAGGGCAAGATGCAATAAAAAATTTGACTACTGCTAAATCGAATCCAACCTGTTCAATTAACAGTAAATATA<br>TGTATCTTGTCACAATCTTAGTTTTGATATAGTTGATGTCATTAGCAATCTTAAATCAA                                                                                                                                                                                                                                                                                                                                                                                                                                                                                                                                                                                                                                                                                                                                                                                                                          | OQ551420                 |
| <b>TCsat17</b> | GACAAGGCTCCTTCTCCTAAAGACAAAACTCTACACCCGAAAAGCCCTCTGAGATTTAACTTAAACCTGAAGAAATCACGGAAAAGGA<br>AAAATCACCTGAGAAAAGTAGAACTGAAAGAG                                                                                                                                                                                                                                                                                                                                                                                                                                                                                                                                                                                                                                                                                                                                                                                                                                                                                                                                                                                                                                                 | OQ551421                 |
| <b>TCsat18</b> | TTGGCAACGTGTTTTAAACACGTGTCCGCGCCATTTTTTAAATTTAATTACCGATTTTCGTGCGATTTTTTAGG                                                                                                                                                                                                                                                                                                                                                                                                                                                                                                                                                                                                                                                                                                                                                                                                                                                                                                                                                                                                                                                                                                   | OQ551422                 |
| <b>TCsat19</b> | TACATACATAAAGTTATTTATCGAAAAATTTGTATACTGATCTTGATTTTTTTATTTTCAGTAGGTCTATTCTAAGAAGAAGAGGGAACGAA<br>GAGGACGCCAGGGTGAGTGAATTTTAATTTTTTCTAAGTGAGGTGAAGTGTGTGAAGTGAAAATGTGAGTGCAACATTTTAGAACACA<br>GTAAGTATTTATAAGTATCAAAATATGAGTGAAAATTAATTAATTAATTGTAGATGAAACGTAATTCTCTCAAAGCTTTTGAAGAAAAATTT<br>CCAGACATTTGACGAAGCATCTCTTAATAATGAAGAAAAACATTCACAGCAAGCTCGAGACTAAGTATATTGTACGAATTTGATTTTGT<br>TTTTTTTCACTAATTTTTTCAATTTTTTGTTCAGATGACTCGAGTGATTGAAAGTGCGTGTGTGGATTTTCGAGTGTTAACAGACA<br>TTTAGTAGTGCGGATTTTTTAAATTTTCGAGTGATTAAAGTGCCAATGGAAGGGATCTTCAGGGAACCTGGACGCTATAATCGTGCTAC<br>AAGGATCAGGATTAAAGGGTGTAGTTGTCAAAGTTTTTTTTTCTAAAAAATTAAGTATAAATCCGTAACATTA                                                                                                                                                                                                                                                                                                                                                                                                                                                                                                                    | OQ551423                 |
| <b>TCsat20</b> | TAATCTGGATGATGAGATGCTTCTTTACACACACTAAACACATAATTTTAAAAATCCCGAACTCGAAAATTTTTCATGCACTTTGAATAA<br>CTTTTCTCCCTCTTTCTTTTACTTTCTCTTCGTAATTTCTTCAAAACTCCTT                                                                                                                                                                                                                                                                                                                                                                                                                                                                                                                                                                                                                                                                                                                                                                                                                                                                                                                                                                                                                           | OQ551424                 |
| <b>TCsat21</b> | TGTTAATTCGTTTCGAGTCGCAATAAATTTGTTAATTTGAAAATAAAATTTAATTCGCGCTTCAAATTAATAAAAAATGTACTCGGACCGCAT<br>TCACGTTCAA                                                                                                                                                                                                                                                                                                                                                                                                                                                                                                                                                                                                                                                                                                                                                                                                                                                                                                                                                                                                                                                                  | OQ551425                 |

|                |                                                                                                                                                                                                                                                                                                                                                                                                                                                                                                                                                                                                                                                                                                                                                     |          |
|----------------|-----------------------------------------------------------------------------------------------------------------------------------------------------------------------------------------------------------------------------------------------------------------------------------------------------------------------------------------------------------------------------------------------------------------------------------------------------------------------------------------------------------------------------------------------------------------------------------------------------------------------------------------------------------------------------------------------------------------------------------------------------|----------|
| <b>TCsat22</b> | AAAAACAAAACAGAAGAAACAATTAATTAAGAGACTAATGGTATTCTGAATAAATAGCTTGATCATTGAAAACTGAAAAATTTGGAAC<br>CAAAAAGCTGAAACCCCTGAGAAATCGAAAAATTTGAACTGAAATGTGAAAGAAACCGCGAGTGACCTACAGATTGACAAGCTTAAAA<br>TTTTAGAAGATGACAAGCTAAAAATCTGGAGGCTGAAAAGGCTAAAAAACTGAGCTAAACTAATAAACTTAACTAGTTAAAACTAAGAA<br>ACTAAAAAAG                                                                                                                                                                                                                                                                                                                                                                                                                                                     | OQ551426 |
| <b>TCsat23</b> | TTTAATATTATTAATAAAATGTTGACATATTTCAAACCTAAGGGTTGGATGTCTTCCCAAACCTTTAGAGGGTTGAAATTTTCAGGAAAGGT<br>AGAGATTTTAATGGGCTTTCATGTGGAATGGGTAAATGCGTCGACAAAAAGAAATAGTACTAGAAAAAATA                                                                                                                                                                                                                                                                                                                                                                                                                                                                                                                                                                             | OQ551427 |
| <b>TCsat24</b> | CAAAAAATTCAAACAATGTCAAAGATGTTTTTAAAAATTTAGACCTCAAAAAGAACTCCGAAATTCTCTTAGCTTTCGTTTTTCATTGG<br>TCCAGAGCGCATGCGCATGCGCGTCTGACCTGTACATTTTCCCCACCAAACGTCCATAGATCACGGTAACTAAAGGGCGTACAATCAT<br>CAAAACAACCTCTAAAGTGCTTAGGTCATGCTCCCCGACATATGAAAAAAAACAGATTTTATCTCAATTAGATCTAAAAGTCACTTCC<br>CCCACCACCCGGACCACTAATGCGGACTTTGAGCTGGATAAAAGTCACAAAGTCATGATTAAAAATTTTAAAGTTTTTTTAACTTAATCGA<br>TAGACATGCGCGTAAGATTAAAAAAATAATTTTTATAAATGTGGAATGACCACCCCTTCTATTGAAAAACAACCCTAAAATTGACAAAAA<br>AAACCAAAATCTACAAATAAAGCCTAATCGATACGGTTTTTGCATATAGGTAGCCCTAAAATATTAATAAAAAATATTTTAGCAAAAAAC<br>CACCCCTTTGTATTTGGGGGTGAGTTAAGGGTAAAAATGTAAAAATTAACCAAAATTTAAATATGTTGTGTATTT<br>TAGTGCGTAGATAAGGCTCTTATATAATTTTTTAGATTTACCCCTTAGGGGTGAGTTTTAACGTATTTAAAAAACCACTAAATT | OQ551428 |
| <b>TCsat25</b> | CTTTGATTTAAAAGTTTAGTTAAAAATTAGATGCTGACGCCACTTTTTGTGTAGGAGAACAATTTATTATACATTATCACGACGTATTTCTT<br>CTTAAGCAAAAATGGTGGATGCGCCGGACAAGCATCCAATATGCTGTACATTTTGGCCCTCCGAATAAATAAAATTTTGCAAAGTGAAG<br>TAAACTATATTATTATTACGTAGCAAGTTTTATGTAGATTGTTGATATATTACACAAATTGCATAAAAAAAC                                                                                                                                                                                                                                                                                                                                                                                                                                                                               | OQ551429 |
| <b>TCsat26</b> | CTATTATTTAAAAAACAAATAATTACACGTTACTTGTATAAAAGTACAAAGTTAAAGAATTTTTGTTGTAACCATCACTGATTCTAAAAAT<br>AACTGAAAAGATTTAAAGTTAAACGTTTTATCTTCAAAGTAAATATAGCTGTTAAATTTCTCTTTCTTTTTTGCAGTGTTCTGCTTA<br>GTTTTCAAAAATTTTAATAACAAAATGCTTTTAAAAAATTAATAATACATAATTAACCAATTAACCAATTAAGACATGGTCTTGTA<br>CAATTTTGTAACCTCGGCGCTCCACCATTTTTAATTTTAGATATCCAACCAATTTACTTCTTTACTGTAAATGA                                                                                                                                                                                                                                                                                                                                                                                      | OQ551430 |
| <b>TCsat27</b> | GGTCTTCACTTTGTGACTATTTTTCAAAGTTTTCTTGTCTGTTTTGTGCATATTTGCGAATGAAATTTGGTTGTCCAAATGACATGAAAT<br>CTTGCACTTACGTAATTTTCAAATCAGGAAGATCGAACCAACACCATTGATGGAGTAGTACATATTTTAATTCAAAGCTTCAAAAAA<br>CATTTGTTTATATGTTTTGTGCACTTTTCACTTTATTGCGCCAAGAAAATTGTTGGTGGATTACAGTAACGGTCCGCTTTTTGTGTAAT<br>GCGCTCGCATTACTTTATATGTAAGTT                                                                                                                                                                                                                                                                                                                                                                                                                                   | OQ551431 |
| <b>TCsat28</b> | TAGTTTTAAATTGTATGGGAATTTTTAGAAAAATAGTTATATCTTCAAAAAGATGTAGCATTGTAAAGACATCATTGCAAGTCTATAAAGT<br>CAAAAAGTACAAAAATTTTGAACATTATTGTTTGGTAAATTTTAAATTAACAGACGGTTTTTTATTTTTTTTATCAGGCAAAATTAAGT<br>TAGGATACTGTAGGATTATAATTTATGGTAAATATACAGTTAAATACTTTAATGTGTTTATTATTAAGTACTTGTAAGAAAAACCTTTTATTT<br>TTGACTAAGCTTATGAAAAATTTATCACTTTAAGTACAAAGAGTGTTTTATTTAAAAAACTTACGTTGTAGCGCAGCCAAGCATAAGA<br>AATTTGAGGGCCGCAAAATTTCTACAATTTTTATTTTTTTT                                                                                                                                                                                                                                                                                                                  | OQ551432 |
| <b>TCsat29</b> | TTTTTCTATCAAGGTTTATAGTCAAAAAACCTTAATTTCCCACTTTTCTTATGTAAAATTGTCTGAGAATTTGCAATTTGTTTTAGTTTCT<br>ACCTGCGACTAATAGTTTTCGAGATATCGGGCAAAATTCAGTTTCGTGAAGGTAAAAAACTTGAATGAGCGGTCTATTACATAATT                                                                                                                                                                                                                                                                                                                                                                                                                                                                                                                                                               | OQ551433 |
| <b>TCsat30</b> | ACGGAAGAAGAAACAACCTGCTAGTGGCACTGAACTGGTGGAGGAGCTAATGTAGAAGAAACAAAACTTCAACAATTGAAGAAGAAAA<br>G                                                                                                                                                                                                                                                                                                                                                                                                                                                                                                                                                                                                                                                       | OQ551434 |
| <b>TCsat31</b> | CTTTTTTTCTTCTTTTTAATTGGGGTTGGTGTCTGGCTTCGAGTCCATTTACCAGACGTATAGTTTTACGCAAAGCATTGTTTGTTT<br>CAGAGTCAGAAATAATTAAAAGAAATATTTTTAGCAAAATCAAAAAAGTTCTT                                                                                                                                                                                                                                                                                                                                                                                                                                                                                                                                                                                                    | OQ551435 |
| <b>TCsat32</b> | CTTGGAGTTGCAAAATGTCGAAAGGGATTCGAACCAGGATCACAAGAATGCTAAGAGGTGAAACGATGTGACACCTCTTTGCGTTCA<br>TGTGATCCTAATGCAAATTTAGTTTTAAATTATTAGAAAAAATAATTTTTTAAGCTTCTGTATAATTGGTTGTCTATATAAGCTGTCAAT<br>TGTAATTTTAGAAATGAAACTCGTATCAGGATCACAGAAACGCAAGGAGGTCTTAACTTTAAAGACCTTTGACGTTCCGTGTTATCC<br>TAATACCAATTCGATTTAAAAATTTGCAAAATAAAAAAATATTTTTTCGG                                                                                                                                                                                                                                                                                                                                                                                                              | OQ551436 |
| <b>TCsat33</b> | TTTTGACTCCAAAACAGAACATTTATCATTTATTTGTGATTTTTAGTGTGTTTTGGGTCTCGACCTAGAAAAAGATGAAGTTATCTTAT<br>CTTTTCCAGGTCGAAGCCCCAAAACTAATTATTTATGTCATCTAATTTTAGGTAAAT                                                                                                                                                                                                                                                                                                                                                                                                                                                                                                                                                                                              | OQ551437 |
| <b>TCsat34</b> | ATGAAAATTGGTTCACAGAATCATATTTAAATAACATTTTACTCCAATGGACATTTTAAAAAATGTCTTGGGACCAACCTAGATTTTCTT<br>TACCAGTTTTTGACAGTCAAAAGTTGAACTGCGACCGAAAAATAGTAGTATTTTATGATTGTGTGGCAGTAAAAAAGGTCAATTCCTTGTGTC<br>TTTGTTCCTCAAAAAAAT                                                                                                                                                                                                                                                                                                                                                                                                                                                                                                                                   | OQ551438 |

|                |                                                                                                                                                                                                                                                                                                                                                                         |          |
|----------------|-------------------------------------------------------------------------------------------------------------------------------------------------------------------------------------------------------------------------------------------------------------------------------------------------------------------------------------------------------------------------|----------|
| <b>TCsat35</b> | AAAATATTAATTTTTGTTAACTTTTGAGACACCCTACCTACATAAACTGTCTTTAAGCTTAAAAATCATCAATATACCTACCTAGAAT<br>TTTATTATTTTCATTTTATTTTATTATTTTATTACTTCTGCACAGACAGTGTTAAAAACAATCAGAAAAAATAAAAA                                                                                                                                                                                               | OQ551439 |
| <b>TCsat36</b> | ATTTTTAATATGTTATAGAAGAAGGTCTTCTGAAGCTGTTTTATAAAAAAGAAGTTCATTGCTCGATGTTATCCAATCAAGACAGCGGAAT<br>TTTTAACTTGGTGTTTTATTTGAATTTTTCAAGAATGGTTATTTTTGGCAGACTCTAACAAGAAAACCAAAAATAATATCTTTCCAA                                                                                                                                                                                  | OQ551440 |
| <b>TCsat37</b> | ATTCGAAGCGCGAATCACTTTAAGTTTAAATTTAAACAAATTCAAATGAAAACGAACCTGAATGCGCTTTCACGGCCGGTTTGATTTATTT<br>ATTAAATTTTAAATTTGAATTTAAATCAAATTTATTCAAGTACTCGAAATAATTTGATTGCAATTAAGGGCCGGTTTACAGTAAGCGATTTA<br>AATTTTAAATCCGAATTAAGAATAATTTGTTTTCGTTTTCAATTTA                                                                                                                           | OQ551441 |
| <b>TCsat38</b> | TACCAAACATGAATTTTTTTGGCCAAGTTCCACTCATTATTTTTGAACGCAATTTTGCAAATAAGACATTTAAACAAAGCTATAATCGTA<br>CAAAAGCTCGTTTTAAAGACAGTCGAGTTCGGAAGATACGAATTTTTGAATTTAAGTTAGGCAAAATCAGGTTTTTGCTATCTGA                                                                                                                                                                                     | OQ551442 |
| <b>TCsat39</b> | TAATAAGCTTTGAAAAATAACACATTTGGCGTGAAACCAAATAGTTTTTTAACTTGTTATTTCAATTAAGTGCCAGAATATTGATAATTG<br>TTTATAACAAACGTCAATTATTAATCAAACCAAAAATTATGGTAATGTGACAAAGTTACGTAAGTGTCAAAATTTACGTTAGTTTCGGAC<br>AACAA                                                                                                                                                                       | OQ551443 |
| <b>TCsat40</b> | CTCTTTTTATATAAAAAAGCAATTTCTAAAACCTTCTAATAAAAAATGAAATCAGCAGTCGCACCTTTACAGACTATCTTAAAAATTGTACAATGAC<br>ATAAGAGTACTGAAGAGTACTACTTTACGGACGATTTTCAGAAAAAACCTTTTAGCATCAGCAGTATTAACGTAGTAAATCAATCAGTATT<br>TATTATAAAGAATAGTGAAAAAATCGGAAAAATCAATTTTGAGAAAAAGTTAAATATATTTCAAATATTGTAAAAAGTGATGAGGTTG<br>T                                                                       | OQ551444 |
| <b>TCsat41</b> | AAGGACCCTTGAATAGTTTGCGAATAATTTTACTTTTTTACAACAAATCTTTATCTTAGTACCTGAACCTCTTACAGCTCAAATAAATTG<br>GTTTTCAAGAGAAAAAAAATATTTGTGCG                                                                                                                                                                                                                                             | OQ551445 |
| <b>TCsat42</b> | GAATTACGAATTTTTTATTTTCTGATGTTGCTAATTTTTTCTCGACTGTGCGAAAGACAAATTCGTTAAATTCTTATAACTGTTCTAGTGCAC<br>ATTTTGTTTCGAATTATTCTGAGTTGGTAGACCAATATTTGAGGCACAAATAGCCAAAAAGGCGTTAAAAATATTTGCTAGTTTCA                                                                                                                                                                                 | OQ551446 |
| <b>TCsat43</b> | GGGGTGTCTACCAAAGTGATGACACCTGGTATTTTAACTACTTTCCCAAACCTTGACTGATATCTTAAAAATTAACAGCAATCTACACAG<br>CCTTGAAAAATCCTTAAAAAATATTGCTAAACCTTCGCTAAACCCCTGAATATGTCTTTTTATACTTTTTTAAATAAAAAAGTTAG                                                                                                                                                                                    | OQ551447 |
| <b>TCsat44</b> | TATAATATCACTTCCGTTTGCGCATTTTTCGGATTTTTTGGGGCTCGGTTAAAAAATTCGTTAACAATGACGTTTTTGATGGAATAAT<br>GTTTTACGAAAGCATATTTTCAATAAAAAAGTGACATTTATTTCTGAAAGGGGGTTCATTTTCTGAACGAGAATTTATAAACGTTTCAGGCT<br>CAGTCGTGGTCGGGTCCTAAGAATTTTCTTACTTTTGCTAAAGTAAATAAGTTTGCCATTTTTTGTTAGTATTTGCCGAAATTTTCGGAAA<br>ATAATTCAGAACAAAAACGTGCATAAACGGCTGAAAAA                                       | OQ551448 |
| <b>TCsat45</b> | CTTTATTTAAAAACTTTTGCTATCACACTATTTGGATTTTTTAAATCCAATTTTTTAAATTTCTGTTTATGGCCATTATTCATTATTCTAACG<br>AAAAATAACACTCAGACCTGAAACTATAAAGCAATAAAAAAGCTAATTTTTGACTGAACGGAAAAATGTATCTCGGAAATGTTTTGATTTT<br>TTAGGAAAAATTTCTCCAACAAATAAATATTGTAGTGCATTTAATTGATTTGGTTTCGGTTTCACTAAAACTGCCA                                                                                            | OQ551449 |
| <b>TCsat46</b> | TCAAACACTATGAAAAAGCCTACAATAAGTAGAATGAACCTCTAGAATTCTCTGAAAAAACGTTTTGCTTTTATTTTTGGGTTTTAAGGT<br>AGATAATTATCACTGTATTCGTAATTTTATAAAAAAATATAAAAAAAGC                                                                                                                                                                                                                         | OQ551450 |
| <b>TCsat47</b> | TCTACTTTTGATTTTGAGAAATAACGTTTTGAATATTTTATTCATTTTATTCGTATTAATAAAGAAATTTCTAAATAAGTTGTTACATCTGT<br>TCTTTATTTTTATCAATCATTTTAAATAATCTGATTAATAATAATGGATACACACCATAAAGCGACATATTTTATCAAACCTTTTCCCTCAT<br>CTGCTCTTGCTTGCGTCTCTTAATTAGAAGATTAGAAAAATAAGTGAAAGGTAAAAATCAGAAGATATAGAAAAATTTAGGAAACAAAGT<br>GGAGTT                                                                    | OQ551451 |
| <b>TCsat48</b> | GAAAAAAATTTACAGAGAAATTTTCGAAAGTACAGTGGAACCTTGATAATCCAAGCTAAGAAAAGAAAAGCTTAATCTTGTTTTACTCAAA<br>TGACACTATTTTTATAGAAAAAATGCTTAAAGCAAACGATTTTTGCGAGATTTATTTATTTACT                                                                                                                                                                                                         | OQ551452 |
| <b>TCsat49</b> | AAAAAAATTTCTTCTGATAAAGTTAGATACGAATAAAAAAACTAAGTTATTGGTTTTAATTAATTAATAATTAATTGACGTTGGAAGAGTTA<br>TTTTACATTTATAATCGATATTTTCTTAAGACAAGTAAGCTAAGGAGTCAAGGATTTTATTGCTGAAGGTAATATGAGCAGTTTAAAAAATA<br>TTAACAAAAAACAGTTTTTGAGTGAACCTTACACTCGAATTTTGAACAAATAGTAAACAAAAATTTATTTTTTTATGTTAAATTAACCAA<br>AAAATCCAAATCTGCAAAAATTTTACCTACGACGAGAATTTTCGGAAGAGAAATGCAATCAACAAAAACAACT | OQ551453 |

|                |                                                                                                                                                                                                                                                                                                                                                                              |          |
|----------------|------------------------------------------------------------------------------------------------------------------------------------------------------------------------------------------------------------------------------------------------------------------------------------------------------------------------------------------------------------------------------|----------|
| <b>TCsat50</b> | CTTAATTATTTTTGACAACTTACTATTTAAGAAACATAAAATTAATCACAATCTGTTATAACTTAAAAAAATTA AAAATGTCCTTAGGTAA<br>CAAATTATTTACTTTGGCCGTAATTA AAAATCGCCCCAGTATTTCAAACGATTTTCTAGAAAAATAACAATCAC                                                                                                                                                                                                  | OQ551454 |
| <b>TCsat51</b> | GTAACTTAAACCCAATTTAGAGTCGAATTTGACTAAAAAAATTTTTAATTCAATAAATAAAAACTTGGTAAAATTGACTTCGCTTATTTAT<br>TCAGTGATATCTTCGTAATTACTAAGTTTATGATCAAAAATAATAACATATTTGGAAAAATATGGACAAATTTACGTAAGAAAAGCTTAATTTT<br>AACCCAATTTTTAGTTTTATTTTATTAATACAAATTTTCGAATTTATTATTTAAAAACTTGGCAAAACCAGCTTCACTTATTTATCAACCGAT<br>ATCTTAAAAATTACTCAATTTATGGCTAACTAATTACAGATTTAAAAAATATGATCAATTTTACGTTAGGAAAA | OQ551455 |
| <b>TCsat52</b> | CAC TTTGTAGAGAATTTTTATTGTCTTTAATTTTTGTTCTTACTTATTTGGTCGTAACACGTGTCTGTTTTCGAGTTATAGGTGAAAAATCG<br>GAAACGGCAC TTTTTTGAGCTCACTTCTAGAATCAAAGACTTTGACAGCGGATATCTTCAAAC TATTTGCGACAAAAAAAAGTGAAAA<br>CAC                                                                                                                                                                           | OQ551456 |
| <b>TCsat53</b> | TGTTTTCC TTTTTTCAGTTATATTTTATTC TTTTTTAGTTTCTCGGGCATT TATTGTTTTATTTTCTCTTAATCTCGGTTATTTTACTTTGCAG<br>TTTTTAAGTTAACTTCTCATGGTTAGACTATTTTTTCTCATTTTCAGCATTTTTA                                                                                                                                                                                                                 | OQ551457 |
| <b>TCsat54</b> | AAGGTTTTGCTACAAATATTTGTATTAAATAATGAGAAATAGGTGAAAATCAAGCGAATAAAAAATGAACTTACAATTAACAGACAGTTTTT<br>CGTAATTTTTCAAACATTTTGACGTAAGTTTGTGAAAAAATGACTGGTTTTCAAAGTAGTTTTAACTAATTTTCGTACAATTTTTTTATTAT<br>TCCTTTGGAAATTTGCAAAACAATCTTGATTGAGTTATTGTAGAAAAAATAACGACAGTTTTTGTATTTTTTTTAAATTTTGACTTTTA<br>TTTTACCAAAAAATATTGTTTCTTATTTAAGATTGCGCAATTCTG                                   | OQ551458 |
| <b>TCsat55</b> | AAAATTAATCCCTTTATTCTAGAACTAGAAATTTCAAATTTCTGGAATTCTAAATGACACTAGGTATAGCAGGCTATTTAGAATTTTGCTAT<br>TCTGATATTTTGCTTTGGAAGTTTAGAATTCTATACTCGAAACATTCTACGAAAAAATTTAAGATTCTAAAATTCAAAATATGTACCCAAAG<br>TTTTCGAACTTTAGACTTGAACATGTGAACTTTGAACTTCTAACTTCTAAATAACTAAAAC TTTGAAGATCTAAAGTTTCAAAGTTGTTT<br>TAAGTTTCAAGATTAGGTACAATTTCTAAGATTCT                                           | OQ551459 |
| <b>TCsat56</b> | AGCTATACAAGTACGAAATATTTTGCAATAATTACAAGATCTTGCCAAAAATTATGCCAAAAATTGTTTTAGTCTATCTCTAGCATGCTAA<br>ATAACTAGCTTAATGAGTGGGTGTTAAATACCTAGGTAAAGTATAGCGTATTATTATTTTTCTTAGCAAATCGTATTTGAAAATACGTTGC<br>CACTTAACATTTAAATTATTTTACCAAGCATTTACAATAATTTACTCAGAAGATGTCTATTATTACCTTTTTTACTTGTTTGATCCAATCGC<br>TAAAAATGGTGGAGGCGCCGGGAAATAATT                                                 | OQ551460 |
| <b>TCsat57</b> | CTTTTTTTACAAAAAATATTTTTAAGTATACTGAGTGCTTTTCAATTTTGCTACAATACAAAATTATGTTTTTTTTAAATAGAAAACTATATAG<br>GTATTTTTGGATTTGATCGATTTTATTAATTTTTGAAACAATTTGTTTTTTTTTACAAAAACAAGCTTTTTTGAAATTTATTATATTTAA<br>ATTAAGAATCCTAAACAGGAGGA                                                                                                                                                      | OQ551461 |
