# Supplementary material for: The Low-Copy-Number Satellite DNAs of the Model Beetle Tribolium castaneum
Source: MDPI journal article supplement (doi:10.3390/genes14050999), 2023-04-28
Supplement: s1 [file s1]

**A) TCsat12**

|              | 10               | 20          | 30         | 40             | 50     | 60          | 70            | 80               | 90  | 100 |    |
|--------------|------------------|-------------|------------|----------------|--------|-------------|---------------|------------------|-----|-----|----|
| TCsat12con   | TCAAAAATTATA     | AACAATACAAC | TTTCCA     | ACCCCTTCCCAGGG | CTCGAT | TTTTTTTAAAC | TTTTTTTATAATG | TAGAGTATTAAATGCT |     |     | 88 |
|              |                  |             |            | BstNI          |        |             |               |                  |     |     |    |
| ChLG6-1      | C.CC.A.GT.C.TC.T | TGC.CT      | G.T        | A.T            | T.A    | CC          | TAAA          | C                |     |     | 91 |
| ChLG6-3      | G.T              | C.A.T       | A.AC.T     | A.T            | T.A    | CC.T        | TAAA          | C.T              |     |     | 94 |
| ChLG6-2      | AACA             | AA          | C.A.A.TT.T | T              | A.A    | T           | CC.TT         | A.C.C            | C   | C   | 88 |
| ChLG6-4      | A                | C           | A.A        | T.T            | T      | A           | C             | G                | C   | CAC | 86 |
| DS497816.1-1 |                  |             |            | T              | T      | C           | C.T           | T                | G.A |     | 88 |
| GG695015-10  |                  |             | T          | A              | T      |             |               |                  | CGC |     | 87 |
| TCsat12c128  |                  |             | T          |                | T      |             | G             |                  | A   |     | 88 |
| DS497816.1-5 |                  | A           |            | C              | T      | A           | C.G           |                  | T   |     | 88 |
| GG695407-23  | T                | G           |            | A              | AT     | T           | C             | A                | A   | T   | 89 |
| DS497816.1-6 |                  | G           |            |                | T      | G           |               |                  | T   |     | 86 |
| TCsat12c11   |                  | G           |            |                | C      | T           | T             | A                | A   | T   | 89 |
| GG695407-6   |                  | G           | A          | A              | T      | T           | T             | A                | C.A | T   | 88 |
| DS497816.1-2 |                  |             |            | A              | T      | C           |               | C                | T   |     | 88 |
| TCsat12c127  |                  | T           |            |                | T      | T           | T             | G.T              | A   |     | 88 |
| GG695407-25  | G                |             |            |                | T      | T           | C             | A                | A   | T   | 88 |
| GG695407-12  | G                | A           |            |                | T      | T           |               | AG.CA            | A   | T   | 88 |
| GG695407-20  | G                | A           |            |                | T      | T           |               | AG.CA            | A   | T   | 88 |
| GG695407-27  | G                |             |            |                | T      | T           |               | A                | A   | T   | 88 |
| TCsat12c120  | G                |             |            |                | T      | T           |               | CA               | A   | T   | 89 |
| GG695407-10  | G                |             |            |                | T      | T           |               | A.CA             | A   | T   | 88 |
| GG695407-18  | G                |             |            |                | T      | T           |               | A.CA             | A   | T   | 88 |
| GG695407-14  | G                |             |            |                | T      | T           |               | A.CA             | A   | CT  | 88 |
| GG695407-17  | G                |             |            |                | T      | T           |               | A.CA             | A   | T   | 88 |
| GG695407-15  | G                |             |            |                | T      | T           |               | A.CA             | A   | T   | 88 |
| GG695407-16  | G                |             |            |                | T      | T           |               | A.CA             | A   | T   | 88 |
| TCsat12c17b  |                  |             | T          |                | T      | C           | A             | A                | A   | T   | 88 |
| TCsat12c110b |                  |             | T          |                | T      | C           |               | A                | A   | T   | 88 |
| TCsat12c133  | G                |             |            |                | T      |             | T             | A                | A   | T   | 89 |
| GG695407-22  | G                |             |            |                | T      | A           | A             | A                | A   | T   | 88 |
| GG695407-2   | T                | C           |            |                | T      |             | A             | A                | A   | T   | 88 |
| GG695407-8   | G                |             |            |                | T      |             | A             | A                | A   | T   | 88 |
| TCsat12c18   |                  | A           |            | G              |        |             |               | A                | A   | T   | 88 |
| TCsat12c121b |                  | G           |            | G              |        |             | G             |                  |     | G   | 88 |
| GG695407-4   | A                | G           | A          |                |        |             | G             |                  | A   |     | 88 |
| TCsat12c111a |                  | G           | A          |                |        |             | G             |                  |     | G   | 88 |
| GG695407-1   |                  |             |            | G              |        |             |               |                  | A   |     | 88 |
| TCsat12c134  |                  | A           | C          |                |        |             |               |                  | A   |     | 87 |
| DS497816.1-3 | T                |             |            |                |        | T           |               | G                |     | T   | 88 |
| DS497816.1-4 |                  |             |            |                |        | T           |               | G                |     | T   | 88 |
| DS497816.1-7 |                  |             |            |                |        |             |               |                  | T   |     | 87 |
| TCsat12c121a |                  |             |            |                | A      | T           | C             |                  |     |     | 87 |
| TCsat12c110a |                  | G           |            |                |        | T           | T             | G.T              |     | T.A | 88 |
| GG695407-3   | T                | C           |            | T              |        | T           |               | G                |     | A   | 88 |
| GG695407-28  |                  |             | T          |                |        | T           |               | G                |     | A   | 89 |
| TCsat12c15b  |                  | C           |            |                |        | T           |               | G                |     | A   | 88 |
| TCsat12c115b |                  | C           |            |                |        | T           |               | G                |     | A   | 88 |
| TCsat12c12   |                  | G           |            |                |        | T           | T             | G.T              |     | A   | 88 |
| TCsat12c119  |                  | C           |            |                |        | T           | T             | G.T              |     | T.A | 88 |
| GG694508-4   |                  |             |            | A              | T      |             | G             | G                |     | A   | 88 |
| GG695407-7   |                  |             |            | A              | T      |             | G             |                  |     | A   | 88 |
| TCsat12c17a  |                  | A           |            |                |        | T           |               | G                |     | A   | 88 |
| GG695407-24  | G                |             | T          |                |        | T           |               | G.G              |     | A   | 88 |
| GG695407-26  |                  |             |            |                |        | T           |               | G                |     | A   | 88 |
| GG695407-9   |                  |             |            |                |        | T           |               | G                |     | A   | 88 |
| GG695407-5   |                  |             |            |                |        | T.A         |               | G                |     | A   | 88 |
| GG695407-11  |                  | G           |            |                |        | T           |               | G                |     | A   | 88 |
| GG695407-19  |                  | G           |            |                |        | T           |               | G                |     | A   | 88 |
| GG695407-13  |                  | G           |            |                |        | T           |               | G                |     | A   | 88 |
| GG695407-21  |                  | G           |            |                |        | T           |               | G                |     | A   | 88 |
| TCsat12c122b |                  | C           |            |                |        | T           |               |                  | C   |     | 88 |
| GG695015-11  |                  |             | T          |                | A      | T           |               |                  | C   | A   | 88 |
| GG695015-12  |                  |             | T          |                | A      | T           |               |                  | C   | A   | 88 |
| GG695015-34  |                  |             | T          |                | A      | T           |               |                  | C   |     | 88 |
| GG695015-17  |                  | C           |            | T              | A      | T           |               |                  | C   |     | 88 |
| GG695015-36  |                  | C           |            | T              | A      | T           |               |                  | C   |     | 88 |
| GG694508-3   |                  | A           |            |                | A      | T           | C             |                  |     |     | 88 |
| TCsat12c125  |                  |             | T          |                |        | TC          | C             |                  |     |     | 88 |
| TCsat12c116  |                  |             |            |                |        | T           | C             |                  |     |     | 88 |
| TCsat12c118  |                  | C           |            |                |        | T           | C             |                  |     |     | 88 |
| TCsat12c132  |                  | G           |            |                |        | T           | C             |                  |     | T   | 88 |
| TCsat12c122a |                  | G           |            | A              |        | T           | C             |                  |     |     | 88 |
| TCsat12c124a |                  |             |            |                |        | T           | C             |                  |     |     | 88 |
| GG695015-1   |                  |             |            |                | A      | T           |               |                  | C   |     | 77 |
| GG695015-5   |                  |             |            |                | A      | T           |               |                  | C   |     | 77 |
| GG695015-30  |                  |             |            |                | A      | T           |               |                  | C   |     | 77 |
| GG695015-4   |                  |             | T          |                |        | T           | C             |                  |     |     | 88 |
| GG695015-32  |                  |             |            |                |        | T           | C             |                  |     |     | 88 |
| GG695015-29  |                  |             | T          |                |        | T           | C             |                  |     |     | 88 |
| GG695015-28  |                  |             | T          |                | A      | T           | C             |                  |     |     | 88 |
| GG695015-7   |                  | C           |            |                | A      | T           | C             |                  |     |     | 88 |

|              |     |     |     |     |     |     |     |     |     |     |     |     |    |
|--------------|-----|-----|-----|-----|-----|-----|-----|-----|-----|-----|-----|-----|----|
| GG695015-31  | --- | ... | C   | ... | --- | ... | TC  | ... | C   | ... | --- | ... | 88 |
| GG695015-3   | --- | ... | ... | --- | ... | ... | TC  | ... | C   | ... | --- | ... | 88 |
| GG695015-2   | --- | ... | ... | --- | ... | ... | TC  | ... | C   | ... | --- | ... | 88 |
| GG695015-14  | --- | ... | C   | ... | --- | ... | TC  | ... | C   | ... | --- | ... | 88 |
| GG695015-24  | --- | ... | ... | --- | ... | T   | A   | ... | C   | ... | --- | T   | 88 |
| GG695015-25  | --- | ... | ... | --- | ... | ... | A   | ... | C   | ... | --- | G   | 88 |
| TCsat12c130b | --- | ... | T   | ... | --- | A   | ... | ... | C   | ... | --- | T   | 88 |
| GG695015-38  | --- | ... | ... | --- | ... | T   | ... | ... | C   | ... | --- | T   | 88 |
| GG695015-8   | --- | ... | C   | ... | --- | A   | ... | ... | C   | ... | --- | T   | 88 |
| GG695015-9   | --- | ... | ... | --- | ... | A   | ... | ... | C   | ... | --- | ... | 88 |
| GG695015-39  | --- | ... | ... | --- | ... | AT  | ... | ... | C   | ... | --- | ... | 88 |
| TCsat12c111b | --- | ... | ... | --- | ... | A   | ... | ... | C   | ... | --- | ... | 88 |
| GG695015-15  | --- | ... | ... | --- | ... | T   | ... | ... | C   | ... | --- | ... | 88 |
| GG695015-16  | --- | ... | ... | --- | ... | T   | ... | ... | C   | ... | --- | ... | 88 |
| TCsat12c15a  | --- | ... | ... | --- | ... | ... | ... | ... | C   | ... | --- | ... | 88 |
| TCsat12c115a | --- | ... | ... | --- | ... | ... | ... | ... | C   | ... | --- | ... | 88 |
| GG695015-13  | --- | ... | ... | --- | ... | T   | ... | A   | ... | C   | --- | C   | 88 |
| GG695015-37  | --- | ... | ... | --- | ... | ... | ... | A   | ... | C   | --- | ... | 88 |
| GG695015-19  | --- | ... | ... | --- | ... | ... | ... | A   | ... | C   | --- | ... | 88 |
| GG695015-35  | --- | ... | ... | --- | ... | ... | ... | A   | ... | C   | --- | ... | 88 |
| TCsat12c130a | --- | ... | ... | --- | ... | ... | ... | A   | ... | C   | --- | ... | 88 |
| TCsat12c124b | --- | ... | ... | --- | ... | ... | ... | A   | ... | C   | --- | C   | 88 |
| GG694508-1   | --- | ... | ... | --- | ... | T   | ... | ... | C   | --- | ... | ... | 88 |
| GG694508-2   | --- | ... | C   | ... | --- | ... | ... | TC  | ... | C   | --- | ... | 88 |
| GG695015-33  | --- | ... | ... | --- | ... | ... | ... | A   | ... | C   | --- | ... | 88 |
| GG695015-22  | --- | ... | A   | ... | --- | ... | ... | TC  | ... | C   | --- | C   | 88 |
| GG695015-23  | --- | ... | ... | --- | ... | ... | ... | TC  | ... | C   | --- | C   | 88 |
| GG695015-26  | --- | ... | ... | --- | ... | ... | ... | TC  | ... | C   | --- | C   | 88 |
| GG695015-27  | --- | ... | ... | --- | ... | ... | ... | TC  | ... | C   | --- | C   | 88 |
| GG695015-6   | --- | ... | ... | --- | ... | ... | ... | TC  | ... | C   | --- | C   | 88 |
| GG695015-18  | --- | ... | ... | --- | ... | ... | ... | TC  | ... | C   | --- | C   | 88 |
| GG695015-20  | --- | ... | ... | --- | ... | ... | ... | TC  | ... | C   | --- | C   | 88 |
| GG695015-21  | --- | ... | ... | --- | ... | ... | ... | TC  | ... | C   | --- | C   | 88 |

|              |     |     |     |     |     |     |     |     |
|--------------|-----|-----|-----|-----|-----|-----|-----|-----|
|              | 110 | 120 | 130 | 140 | 150 | 160 | 170 |     |
| TCsat12con   | ... | ... | ... | ... | ... | ... | ... | 154 |
|              | C   | T   | T   | C   | G   | A   | C   | A   |
| ChLG6-1      | ... | T   | ... | CTA | ... | G   | A   | C   |
| ChLG6-3      | ... | T   | ... | ... | ... | T   | A   | ... |
| ChLG6-2      | ... | ... | ... | AC  | ... | G   | GA  | ... |
| ChLG6-4      | ... | TC  | ... | A   | AC  | ... | GA  | ... |
| DS497816.1-1 | ... | ... | ... | A   | ... | A   | ... | ... |
| GG695015-10  | ... | ... | ... | AAA | ... | ... | ... | ... |
| TCsat12c128  | ... | ... | ... | T   | ... | A   | ... | ... |
| DS497816.1-5 | ... | ... | ... | ... | ... | G   | A   | ... |
| GG695407-23  | ... | ... | ... | ... | ... | G   | ... | ... |
| DS497816.1-6 | ... | ... | ... | T   | ... | AG  | ... | ... |
| TCsat12c11   | ... | ... | ... | A   | ... | ... | ... | ... |
| GG695407-6   | ... | ... | ... | T   | ... | T   | ... | ... |
| DS497816.1-2 | ... | ... | ... | ... | ... | T   | ... | ... |
| TCsat12c127  | ... | ... | ... | G   | ... | T   | ... | ... |
| GG695407-25  | ... | ... | ... | T   | ... | C   | ... | ... |
| GG695407-12  | ... | ... | ... | T   | ... | ... | ... | ... |
| GG695407-20  | ... | ... | ... | T   | ... | ... | ... | ... |
| GG695407-27  | ... | ... | ... | T   | ... | A   | ... | ... |
| TCsat12c120  | ... | ... | ... | T   | ... | C   | ... | ... |
| GG695407-10  | ... | ... | ... | T   | ... | C   | ... | ... |
| GG695407-18  | ... | ... | ... | T   | ... | C   | ... | ... |
| GG695407-14  | ... | ... | ... | T   | ... | ... | ... | ... |
| GG695407-17  | ... | ... | ... | T   | ... | ... | ... | ... |
| GG695407-15  | ... | ... | ... | T   | ... | ... | ... | ... |
| GG695407-16  | ... | ... | ... | T   | ... | ... | ... | ... |
| TCsat12c17b  | ... | ... | ... | T   | ... | ... | ... | ... |
| TCsat12c110b | ... | ... | ... | A   | ... | T   | ... | ... |
| TCsat12c133  | ... | ... | ... | TT  | ... | C   | ... | ... |
| GG695407-22  | ... | ... | ... | T   | ... | ... | ... | ... |
| GG695407-2   | ... | ... | ... | A   | ... | T   | ... | ... |
| GG695407-8   | ... | ... | ... | A   | ... | T   | ... | ... |
| TCsat12c18   | ... | ... | ... | A   | ... | ... | ... | ... |
| TCsat12c121b | ... | ... | ... | ... | ... | ... | ... | ... |
| GG695407-4   | ... | ... | ... | ... | ... | ... | ... | ... |
| TCsat12c111a | ... | ... | ... | ... | ... | ... | ... | ... |
| GG695407-1   | ... | ... | ... | A   | ... | G   | ... | ... |
| TCsat12c134  | ... | ... | ... | ... | ... | G   | ... | ... |
| DS497816.1-3 | ... | ... | ... | T   | ... | C   | ... | ... |
| DS497816.1-4 | ... | ... | ... | ... | ... | G   | ... | ... |
| DS497816.1-7 | ... | ... | ... | ... | ... | ... | ... | ... |
| TCsat12c121a | ... | ... | ... | TT  | ... | C   | ... | ... |
| TCsat12c110a | ... | ... | ... | A   | ... | T   | ... | ... |
| GG695407-3   | ... | ... | ... | T   | ... | C   | ... | ... |
| GG695407-28  | ... | ... | ... | T   | ... | C   | ... | ... |
| TCsat12c15b  | ... | ... | ... | TT  | ... | C   | ... | ... |
| TCsat12c115b | ... | ... | ... | TT  | ... | C   | ... | ... |
| TCsat12c12   | ... | ... | ... | TT  | ... | C   | ... | ... |
| TCsat12c119  | ... | ... | ... | TT  | ... | C   | ... | ... |

|              |                          |     |
|--------------|--------------------------|-----|
| GG694508-4   | .....C.....              | 153 |
| GG695407-7   | ...T...T...C...T...      | 154 |
| TCsat12c17a  | ...T...T...C...T...      | 154 |
| GG695407-24  | ...T...T...C...T...      | 154 |
| GG695407-26  | ...GT...C...T...         | 154 |
| GG695407-9   | .....C...T...            | 154 |
| GG695407-5   | ...T...C...T...          | 154 |
| GG695407-11  | ...T...C...T...          | 154 |
| GG695407-19  | ...T...C...T...          | 154 |
| GG695407-13  | ...T...G.C...T...        | 154 |
| GG695407-21  | ...T...G.C...T...        | 154 |
| TCsat12c122b | .....G.....              | 147 |
| GG695015-11  | .....T.....A.....        | 149 |
| GG695015-12  | .....A.....              | 149 |
| GG695015-34  | T...T.....A.....         | 149 |
| GG695015-17  | .....T.....A.....        | 149 |
| GG695015-36  | .....A.....A.....        | 149 |
| GG694508-3   | .....A.....              | 149 |
| TCsat12c125  | ...T...T.....AA.....G... | 156 |
| TCsat12c116  | .....A.....              | 154 |
| TCsat12c118  | .....A.....              | 154 |
| TCsat12c132  | T.....                   | 154 |
| TCsat12c122a | .....G.....              | 154 |
| TCsat12c124a | .....                    | 154 |
| GG695015-1   | .....T...T...AA.....     | 145 |
| GG695015-5   | .....T...T...AA.....     | 145 |
| GG695015-30  | .....T...T...AA.....     | 145 |
| GG695015-4   | .....T...T...AA.....     | 156 |
| GG695015-32  | .....T...T...AA.....     | 156 |
| GG695015-29  | .....T...T.A.AA.....     | 157 |
| GG695015-28  | .....T...T...AA.....     | 156 |
| GG695015-7   | .....T...T.A.AA.....     | 157 |
| GG695015-31  | .....T...T...AAT.....    | 150 |
| GG695015-3   | .....T...T...AAT.....    | 150 |
| GG695015-2   | .....T...T...AA.....     | 156 |
| GG695015-14  | .....T...T.A.AA.....     | 157 |
| GG695015-24  | .....C.....              | 154 |
| GG695015-25  | .....C.....              | 154 |
| TCsat12c130b | .....                    | 154 |
| GG695015-38  | .....                    | 154 |
| GG695015-8   | .....                    | 154 |
| GG695015-9   | .....A.....              | 155 |
| GG695015-39  | .....                    | 154 |
| TCsat12c111b | .....A.....T.....        | 154 |
| GG695015-15  | .....A.....              | 155 |
| GG695015-16  | .....                    | 154 |
| TCsat12c15a  | .....A.....              | 155 |
| TCsat12c115a | .....A.....              | 155 |
| GG695015-13  | .....                    | 148 |
| GG695015-37  | .....A.....              | 149 |
| GG695015-19  | .....A.....              | 155 |
| GG695015-35  | .....                    | 154 |
| TCsat12c130a | .....                    | 154 |
| TCsat12c124b | .....                    | 148 |
| GG694508-1   | .....                    | 154 |
| GG694508-2   | .....                    | 154 |
| GG695015-33  | ...T.....A.....          | 155 |
| GG695015-22  | .....T...C.....          | 148 |
| GG695015-23  | .....T...C.....          | 148 |
| GG695015-26  | .....T...C.....          | 148 |
| GG695015-27  | .....T...C.....          | 148 |
| GG695015-6   | .....                    | 148 |
| GG695015-18  | .....T.....A.....        | 149 |
| GG695015-20  | .....T.....A.....        | 149 |
| GG695015-21  | .....T.....A.....        | 149 |

## B) TCsat13

|               | 10                                | 20                       | 30                                 | 40              | 50           | 60       | 70         | 80  | 90    | 100 |      |
|---------------|-----------------------------------|--------------------------|------------------------------------|-----------------|--------------|----------|------------|-----|-------|-----|------|
| TCsat13con    | GTTATAGTAGGGAGCTCAGGATCAATTAAAAAT | TATTTTCAGAAATTTTCTCATTCC | TACCCCAAACTTATAGGGGTAAATTGGCCAAAAA |                 |              |          |            |     |       |     | 96   |
| DS497894.1-1  | A                                 | AluI                     | DraI                               | TA              | G.A.A.A.CA.C | TT       | AGACAG.A.C |     |       |     | G 96 |
| GG694187-21   |                                   |                          |                                    | C.T             | A            | T.TG     | GAAA.A     | C   | AAG.G |     | G 96 |
| DS497837.1-13 | C                                 | ACTCAG.C                 | C.A.CC                             | CTGCC.CG.G.C.CG | TC.C         | TTC.AAAT | G.A        |     |       |     | G 96 |
| GG694367-10   | C                                 | ATTCAG.C                 | C.A.CC                             | CTGCC.CG.G.C.CG | TC.C         | TTC.AAAT | G.A        |     |       |     | G 96 |
| GG694187-19   | AA                                | T                        | G.C.T                              | G.A.A           | CA           | AA       |            |     |       |     | 96   |
| GG694187-20   | A                                 | A                        | G.C.T                              | G               | A            | AA       |            |     |       |     | 96   |
| GG694187-18   |                                   |                          |                                    |                 | A            |          | G          |     |       |     | 96   |
| GG694187-6    | A.A                               |                          | T                                  |                 | A            | TT       |            |     |       |     | 96   |
| GG694187-11   | A                                 |                          |                                    |                 | A            |          |            |     |       |     | 96   |
| GG694187-13   |                                   |                          |                                    |                 | A.T          |          | AA.TG      | A   |       |     | G 96 |
| DS497894.1-5  |                                   | T                        |                                    |                 | G            | T        | AA.G       | C.A | T     |     | 96   |
| GG694367-8    |                                   | T                        |                                    |                 | G            | T        | AA.G       | C.A | T     |     | 96   |
| TCsat13cl133  |                                   | T                        |                                    |                 | G            | T        | AA.G       | C.A | T     |     | 96   |
| GG694187-15   |                                   | T                        |                                    |                 | A.G          |          |            |     |       |     | 96   |
| GG694367-3    | AA                                |                          |                                    |                 |              |          | AA.G       | A   |       |     | 96   |
| GG694367-7    |                                   |                          |                                    |                 | A            |          | AA.G       | A   |       |     | 96   |
| TCsat13cl137  |                                   |                          |                                    |                 |              |          | G          | A   |       |     | 95   |
| TCsat13cl143  |                                   |                          |                                    |                 |              |          | G          | A   |       |     | 95   |
| TCsat13cl148  |                                   | T                        |                                    |                 | G            |          |            |     |       |     | 96   |
| TCsat13cl150  |                                   | T                        |                                    |                 | G            |          |            |     |       |     | 96   |
| TCsat13cl134  | A                                 |                          |                                    |                 | A            |          |            |     |       |     | 96   |
| TCsat13cl121a | A                                 |                          |                                    |                 |              |          |            |     |       |     | 96   |
| DS497837.1-11 |                                   |                          |                                    |                 | T            |          | C          | T   |       |     | 96   |
| TCsat13cl124b |                                   | T                        |                                    |                 |              |          | C          | T   |       |     | 96   |
| TCsat13cl155  |                                   |                          |                                    |                 |              |          | C          | T   |       |     | 96   |
| TCsat13cl135  | A.A                               |                          |                                    |                 |              |          |            |     |       |     | 96   |
| GG694187-1    |                                   |                          |                                    |                 | T            |          |            |     |       |     | 93   |
| DS497837.1-9  |                                   | T                        |                                    |                 |              |          |            |     |       |     | 96   |
| TCsat13cl129  |                                   | T                        |                                    |                 |              |          |            |     |       |     | 96   |
| TCsat13cl142  |                                   | T                        |                                    |                 |              |          |            |     |       |     | 96   |
| TCsat13cl14a  | A                                 |                          |                                    |                 |              |          |            |     |       |     | 96   |
| TCsat13cl15b  |                                   |                          |                                    |                 |              |          |            |     |       |     | 96   |
| GG694187-8    | A                                 | T                        |                                    |                 | A            |          | AA.G.A     | A   |       |     | G 96 |
| GG694187-3    | A                                 |                          |                                    |                 |              |          | AA.G       | A   |       |     | G 96 |
| GG694187-4    |                                   |                          |                                    |                 |              |          | G.AA.G     | A   |       |     | G 96 |
| GG694187-9    |                                   |                          |                                    |                 |              |          | AA.G       | A   |       |     | G 96 |
| GG694367-2    | AA                                |                          |                                    |                 | A            | A        |            |     |       |     | 96   |
| GG694367-6    | AA.A                              |                          |                                    |                 | A            | A        |            |     |       |     | 96   |
| DS497837.1-5  |                                   |                          |                                    |                 | T.T          |          |            |     |       |     | 96   |
| TCsat13cl149  |                                   | T                        |                                    |                 | T            |          |            |     |       |     | 96   |
| GG694187-12   |                                   |                          |                                    |                 | A            |          | A          |     |       |     | 96   |
| TCsat13cl14b  | C                                 | T                        |                                    |                 |              |          |            |     |       |     | 96   |
| TCsat13cl113  |                                   | T                        |                                    |                 | A.G          |          |            |     |       |     | 96   |
| DS497837.1-2  |                                   | T                        |                                    |                 | G            |          |            |     |       |     | 96   |
| DS497837.1-7  |                                   |                          |                                    |                 |              |          |            |     |       |     | 96   |
| TCsat13cl147  |                                   | A.T                      |                                    |                 |              | A        |            |     |       |     | 96   |
| TCsat13cl121b |                                   |                          |                                    |                 |              |          |            |     |       |     | 95   |
| TCsat13cl124a |                                   |                          |                                    |                 | A            |          |            |     |       |     | 96   |
| DS497837.1-8  | A                                 |                          |                                    |                 | G            |          |            |     |       |     | 96   |
| DS497894.1-6  | A.A                               |                          |                                    |                 | G            |          |            |     |       |     | 96   |
| TCsat13cl141  | A.A                               |                          |                                    |                 | G            |          |            |     |       |     | 96   |
| GG694187-2    | C                                 | T                        |                                    |                 |              |          |            |     |       |     | 96   |
| GG694187-7    | G.C                               | T                        |                                    |                 |              |          |            |     |       |     | 96   |
| DS497837.1-4  | C                                 | T                        |                                    |                 |              |          |            |     |       |     | 96   |
| TCsat13cl138  | A                                 |                          |                                    |                 | G            |          |            |     |       |     | 96   |
| TCsat13cl139  | A                                 |                          |                                    |                 | G            |          |            |     |       |     | 96   |
| DS497837.1-12 |                                   |                          |                                    |                 | A            |          |            |     |       |     | 96   |
| DS497837.1-10 |                                   |                          |                                    |                 |              |          |            |     |       |     | 96   |
| TCsat13cl126  |                                   |                          |                                    |                 |              |          |            |     |       |     | 95   |
| TCsat13cl131  |                                   |                          |                                    |                 |              |          |            |     |       |     | 95   |
| TCsat13cl152  |                                   |                          |                                    |                 |              |          |            |     |       |     | 95   |
| TCsat13cl118b | A                                 |                          |                                    |                 | G            |          |            |     |       |     | 96   |
| TCsat13cl118a | A.A                               |                          |                                    |                 |              |          |            |     |       |     | 96   |
| TCsat13cl15a  |                                   | T                        |                                    |                 | G            |          |            |     |       |     | 96   |
| TCsat13cl154  | A                                 |                          |                                    |                 |              |          |            |     |       |     | 96   |
| TCsat13cl132  |                                   | T                        |                                    |                 |              |          |            |     |       |     | 96   |
| DS497894.1-3  |                                   |                          | C                                  |                 | G            | A        |            |     |       |     | 96   |
| GG694367-4    |                                   |                          | C                                  |                 | G            | A        |            |     |       |     | 96   |
| DS497837.1-6  |                                   |                          |                                    |                 | A            |          | AA.G       |     |       |     | 96   |
| TCsat13cl140  | A                                 |                          |                                    |                 |              |          |            |     |       |     | 96   |
| TCsat13cl144  | A                                 |                          |                                    |                 |              |          |            |     |       |     | 96   |
| GG694367-9    |                                   |                          |                                    |                 | A            |          |            |     |       |     | 96   |
| DS497837.1-1  | AA                                | A                        | T                                  |                 | G            | T        | AA.G       |     |       |     | 96   |
| GG694187-5    | G                                 | C                        | T                                  |                 | G            | A        | AA.G       | A   |       |     | 96   |
| GG694187-10   | G                                 | C                        | T                                  |                 | G            | A        | AA.G       | A   |       |     | 96   |
| DS497837.1-3  | C                                 |                          |                                    |                 | A            | A        | AA.G       | T   | A     |     | 96   |
| GG694187-14   | C                                 |                          |                                    |                 | A            | A        | C.AA.G.A   | A   |       |     | 96   |
| TCsat13cl127  |                                   |                          |                                    |                 | A            |          | A.G.A      | A   |       |     | 95   |
| GG694187-17   | A                                 | G                        | G                                  |                 | TG           | A        | GAAACA     | C   |       |     | 96   |
| DS497894.1-2  | C                                 | T                        |                                    |                 | G            | A        | ACACCG     |     |       |     | 96   |
| GG694187-16   | C                                 | A                        | C                                  |                 | G            | A        | AAATCG     |     | T     |     | 96   |

DS497894.1-4  
GG694367-5  
GG694367-1

|               |            |               |           |      |                |            |           |                          |
|---------------|------------|---------------|-----------|------|----------------|------------|-----------|--------------------------|
| DSat13con     | TTTGAAAATC | TTTATTTACATTC | CGGATCGAG | TTCG | TTTTTTGTACATGG | TACCTCTGAT | TATGCTCCA |                          |
|               |            |               |           |      | KpnI           |            |           |                          |
| DS497894.1-1  |            | A.G.          | T         |      | AG             | C.A.       | G.C.      | A..G.                    |
| GG694187-21   |            | G.A           | T         | T    | A              | C.T.C      | A.        | A..T.A                   |
| DS497837.1-13 |            |               |           |      | T.AG           | A          | C.T       |                          |
| GG694367-10   |            |               |           |      | T.AG           | A          | C.T       |                          |
| GG694187-19   | C.         | A             | T         |      | TG             |            | C         |                          |
| GG694187-20   |            | T             | T         |      | TG             | C.TGC      | C         |                          |
| GG694187-18   |            | C             | T         | TC   | TG             | G          | C.TGC     | C                        |
| GG694187-6    |            | C             | T         | TT   | A.TG           | C.TGC      | C         |                          |
| GG694187-11   |            | C             | T         | TC   | TG             | G          | C.TGC     | C                        |
| GG694187-13   |            |               |           |      | T.AG           | A          | G         |                          |
| DS497894.1-5  |            | G             |           |      | C              |            |           | C.ATAATCCCTGATATGCTGGAGC |
| GG694367-8    |            | G             |           |      | C              |            |           | C.ATAATCCCTGATATGCTGGAGC |
| TCsat13cl33   |            | T             |           |      | C              |            |           | C.ATAATCCCTGATATGCTGGAGC |
| GG694187-15   |            |               |           |      | T.AG           | G.A        | T         |                          |
| GG694367-3    |            |               |           |      | T.AG           | T          |           | C.A.T                    |
| GG694367-7    |            |               |           |      | T.AG           | T          |           | C.A                      |
| TCsat13cl37   |            |               |           |      | C              | T.AG       | A         | T                        |
| TCsat13cl143  |            |               |           |      | C              | T.AG       | A         | T                        |
| TCsat13cl148  |            |               |           |      | T.AG           | A          | T         | C.AA                     |
| TCsat13cl150  |            |               |           |      | T.AG           | A          | T         | C.AA                     |
| TCsat13cl134  |            |               |           |      | T.AG           | A          | T         | C.A                      |
| TCsat13cl21a  |            |               |           |      | T.AG           | A          | T         | C.A                      |
| DS497837.1-11 |            |               |           |      | T.AG           | A          | T         | C.A                      |
| TCsat13cl124b |            |               |           |      | T.AG           | A          | T         | C.A                      |
| TCsat13cl155  |            |               |           |      | T.AG           | A          | T         | C.A                      |
| TCsat13cl135  |            |               |           |      | C              | T.AG       | A         | T                        |
| GG694187-1    |            |               |           |      | T.AG           | A          | T         | C.AA                     |
| DS497837.1-9  |            |               |           |      | C              | T.AG       | A         | T                        |
| TCsat13cl129  |            |               |           |      | C              | T.AG       | A         | T                        |
| TCsat13cl142  |            |               |           |      | C              | T.AG       | A         | T                        |
| TCsat13cl14a  |            |               |           |      | C              | T.AG       | A         | T                        |
| TCsat13cl15b  |            |               |           |      | C              | T.AG       | A         | T                        |
| GG694187-8    | A          |               | T         |      | C              |            |           |                          |
| GG694187-3    |            |               |           |      | C              |            |           | T                        |
| GG694187-4    | A          |               |           |      | C.A            |            |           |                          |
| GG694187-9    |            |               |           |      | C              |            |           | A                        |
| GG694367-2    |            |               |           |      |                |            |           | T                        |
| GG694367-6    |            |               |           |      |                |            |           | T                        |
| DS497837.1-5  |            |               |           |      | C              |            |           | A                        |
| TCsat13cl149  |            |               |           |      | C              |            |           | A                        |
| GG694187-12   |            |               |           |      |                |            |           | T                        |
| TCsat13cl14b  |            |               |           |      | T              |            |           | C.G                      |
| TCsat13cl13   |            |               |           |      |                |            |           | C                        |
| DS497837.1-2  |            |               |           |      | C              |            |           |                          |
| DS497837.1-7  |            |               |           |      | C              |            |           |                          |
| TCsat13cl147  |            |               |           |      | G              |            |           | C                        |
| TCsat13cl121b |            |               |           |      | T              |            |           | C.G                      |
| TCsat13cl124a |            |               |           |      | T              |            |           | C.G                      |
| DS497837.1-8  |            |               |           |      | T              |            |           | C.G                      |
| DS497894.1-6  |            |               |           |      | T              |            |           | C.G                      |
| TCsat13cl141  |            |               |           |      | T              |            |           | C.G                      |
| GG694187-2    |            |               |           |      |                |            |           | C                        |
| GG694187-7    |            |               |           |      | G              |            |           | C                        |
| DS497837.1-4  |            |               |           |      | C              |            |           |                          |
| TCsat13cl138  |            |               |           |      | C              |            |           |                          |
| TCsat13cl139  |            |               |           |      | C              |            |           |                          |
| DS497837.1-12 |            |               |           |      | C              |            |           |                          |
| DS497837.1-10 |            |               |           |      | C              |            |           |                          |
| TCsat13cl126  |            |               |           |      | C              |            |           |                          |
| TCsat13cl131  |            |               |           |      | C              |            |           |                          |
| TCsat13cl152  |            |               |           |      | C              |            |           |                          |
| TCsat13cl118b |            |               |           |      | C              |            |           |                          |
| TCsat13cl118a |            |               |           |      | C              |            |           |                          |
| TCsat13cl15a  |            |               |           |      | C              |            |           |                          |
| TCsat13cl154  |            |               |           |      | T              |            |           |                          |
| TCsat13cl132  |            |               |           |      | T              |            |           |                          |
| DS497894.1-3  |            |               |           |      | C              |            |           |                          |
| GG694367-4    |            |               |           |      | C              |            |           |                          |
| DS497837.1-6  |            |               |           |      | T              |            |           |                          |
| TCsat13cl140  |            |               |           |      | C              |            |           |                          |
| TCsat13cl144  |            |               |           |      | C              |            |           |                          |
| GG694367-9    |            |               |           |      | C              |            |           |                          |
| DS497837.1-1  | C          |               |           |      |                |            |           |                          |

|              |                                                     |     |
|--------------|-----------------------------------------------------|-----|
| GG694187-17  | ..A.....T...C...T..TG.....C.T.....                  | 174 |
| DS497894.1-2 | .....TC..TCA.....TG..A.....C.TGC.....T..C...A.....A | 174 |
| GG694187-16  | .....TGG.....G.....C.T.C.....                       | 174 |
| DS497894.1-4 | .....TG..T.....G.....C.T.....T.....                 | 174 |
| GG694367-5   | .....TG..T.....G.....C.T.....T.....                 | 174 |
| GG694367-1   | .....TG..T.....TG.....C.T.....T.....                | 174 |

|            |                                                 |     |     |     |     |     |     |     |     |     |     |
|------------|-------------------------------------------------|-----|-----|-----|-----|-----|-----|-----|-----|-----|-----|
|            | 210                                             | 220 | 230 | 240 | 250 | 260 | 270 | 280 | 290 | 300 |     |
| TCsat13con | GCAATCAAATTTGACATATTCAAATAAAGGGGGTAGTGGGGAATTAA |     |     |     |     |     |     |     |     |     | 264 |

|               |                                                                                     |     |
|---------------|-------------------------------------------------------------------------------------|-----|
| DS497894.1-1  | AT.....G.G.....G..T.G..A.....G..CG.TCGGATCG.....GTTT..TGC.C..-G.GGCA.TC.-TTT..CG..- | 266 |
| GG694187-21   | CT.....G.G.....T.....A.....T.....TT.C..T..G.TGTTAT.....TT.G..                       | 260 |
| DS497837.1-13 | .....T.....                                                                         | 264 |
| GG694367-10   | .....T.....                                                                         | 264 |
| GG694187-19   | .....GG.....A.....T.....T.....G...C.A.....                                          | 264 |
| GG694187-20   | C.....G.G.....C..T.T..T.TC...A.....A.....T.....T.....                               | 263 |
| GG694187-18   | .....T.....G.....A.....T.....G.....                                                 | 264 |
| GG694187-6    | .....T.....G.....A.....T.....G.....                                                 | 264 |
| GG694187-11   | .....T.....G.....                                                                   | 264 |
| GG694187-13   | .....G.....T.....T.....                                                             | 264 |
| DS497894.1-5  | .....C.....T.....                                                                   | 286 |
| GG694367-8    | .....C.....A.....G.....                                                             | 286 |
| TCsat13cl33   | .....C.....A.....G.....                                                             | 286 |
| GG694187-15   | .....G.....T.A.....T.....C.....                                                     | 264 |
| GG694367-3    | .....A.....                                                                         | 264 |
| GG694367-7    | .....G.....A.....                                                                   | 264 |
| TCsat13cl37   | .....T.....                                                                         | 263 |
| TCsat13cl143  | .....T.....                                                                         | 263 |
| TCsat13cl148  | .....                                                                               | 264 |
| TCsat13cl150  | .....                                                                               | 264 |
| TCsat13cl134  | .....                                                                               | 264 |
| TCsat13cl121a | .....                                                                               | 264 |
| DS497837.1-11 | .....                                                                               | 264 |
| TCsat13cl24b  | .....                                                                               | 264 |
| TCsat13cl155  | .....                                                                               | 264 |
| TCsat13cl135  | .....A.....                                                                         | 264 |
| GG694187-1    | .....T.....                                                                         | 261 |
| DS497837.1-9  | .....T.....                                                                         | 264 |
| TCsat13cl129  | .....T.....                                                                         | 264 |
| TCsat13cl142  | .....T.....                                                                         | 264 |
| TCsat13cl14a  | .....T.....                                                                         | 264 |
| TCsat13cl15b  | .....C.....                                                                         | 264 |
| GG694187-8    | .....C.....T.....T.....                                                             | 264 |
| GG694187-3    | .....C.....A.....T.....T.....                                                       | 264 |
| GG694187-4    | .....G.....C.....A.....T.....G.....                                                 | 264 |
| GG694187-9    | .....C.....A.....T.....T.....G.....                                                 | 265 |
| GG694367-2    | .....C.....T.....T.....                                                             | 264 |
| GG694367-6    | .....C.....T.....T.....                                                             | 264 |
| DS497837.1-5  | .....T.....TT.....                                                                  | 264 |
| TCsat13cl149  | .....T.....T.....T.....                                                             | 264 |
| GG694187-12   | .....AA.....A.....                                                                  | 264 |
| TCsat13cl14b  | .....A.....                                                                         | 263 |
| TCsat13cl113  | .....T.....                                                                         | 264 |
| DS497837.1-2  | .....T.....G.....                                                                   | 264 |
| DS497837.1-7  | .....C.....A.....G.....                                                             | 264 |
| TCsat13cl147  | .....                                                                               | 264 |
| TCsat13cl121b | .....                                                                               | 263 |
| TCsat13cl124a | .....A.....                                                                         | 264 |
| DS497837.1-8  | .....                                                                               | 264 |
| DS497894.1-6  | .....A.....                                                                         | 264 |
| TCsat13cl141  | .....A.....                                                                         | 264 |
| GG694187-2    | .....A.....                                                                         | 264 |
| GG694187-7    | .....T.....                                                                         | 264 |
| DS497837.1-4  | .....T.....                                                                         | 263 |
| TCsat13cl138  | .....A.....                                                                         | 264 |
| TCsat13cl139  | .....A.....                                                                         | 264 |
| DS497837.1-12 | .....                                                                               | 264 |
| DS497837.1-10 | .....A.....                                                                         | 264 |
| TCsat13cl126  | .....A.....                                                                         | 263 |
| TCsat13cl131  | .....A.....                                                                         | 263 |
| TCsat13cl152  | .....A.....                                                                         | 263 |
| TCsat13cl118b | .....A.....                                                                         | 264 |
| TCsat13cl118a | .....T.....                                                                         | 264 |
| TCsat13cl15a  | .....                                                                               | 264 |
| TCsat13cl154  | .....                                                                               | 264 |
| TCsat13cl132  | .....                                                                               | 264 |
| DS497894.1-3  | .....C.....                                                                         | 264 |
| GG694367-4    | .....C.....G.....                                                                   | 264 |
| DS497837.1-6  | .....                                                                               | 264 |
| TCsat13cl140  | .....T.....T.....                                                                   | 264 |
| TCsat13cl144  | .....T.....T.....                                                                   | 264 |
| GG694367-9    | .....A.....                                                                         | 264 |
| DS497837.1-1  | TT.....G.G.....T.G.....C...A.....T.....T.....T.....                                 | 264 |
| GG694187-5    | .....G.....T.....                                                                   | 264 |
| GG694187-10   | .....G.....T.....                                                                   | 264 |
| DS497837.1-3  | T.....G.G.....T.....                                                                | 264 |

|              |                                     |       |        |       |                      |     |
|--------------|-------------------------------------|-------|--------|-------|----------------------|-----|
| GG694187-14  | T.....G.G.....                      | ----- | .....  | ----- | .....                | 264 |
| TCsat13cl27  | T.....G.G.....                      | ----- | .....  | ----- | .....                | 263 |
| GG694187-17  | TT.....G.G.....TTG.....A.....       | ----- | .....  | ----- | .....                | 264 |
| DS497894.1-2 | C.....T.G.....T.G.....A.....        | ----- | .....  | ----- | .....                | 264 |
| GG694187-16  | TTG...CG.G.....T.G.....A.....       | ----- | A..... | ----- | T.T.....T.....T..... | 264 |
| DS497894.1-4 | TT.....G.G.....T.....T.G.....A..... | ----- | .....  | ----- | .....                | 264 |
| GG694367-5   | TT.....G.G.....T.....T.G.....A..... | ----- | .....  | ----- | .....                | 264 |
| GG694367-1   | TT.....G.G.....T.....T.G.....A..... | ----- | .....  | ----- | .....                | 264 |

|            |        |    |     |
|------------|--------|----|-----|
| TCsat13con | .... . | AT | 266 |
|------------|--------|----|-----|

|               |         |     |
|---------------|---------|-----|
| DS497894.1-1  | -----   | 266 |
| GG694187-21   | ..GTTT  | 266 |
| DS497837.1-13 | ..----- | 266 |
| GG694367-10   | ..----- | 266 |
| GG694187-19   | ..----- | 266 |
| GG694187-20   | ..----- | 265 |
| GG694187-18   | ..----- | 266 |
| GG694187-6    | ..----- | 266 |
| GG694187-11   | ..----- | 266 |
| GG694187-13   | ..----- | 266 |
| DS497894.1-5  | ..----- | 288 |
| GG694367-8    | ..----- | 288 |
| TCsat13cl133  | ..----- | 288 |
| GG694187-15   | ..----- | 266 |
| GG694367-3    | ..----- | 266 |
| GG694367-7    | ..----- | 266 |
| TCsat13cl137  | ..----- | 265 |
| TCsat13cl143  | ..----- | 265 |
| TCsat13cl148  | ..----- | 266 |
| TCsat13cl150  | ..----- | 266 |
| TCsat13cl134  | ..----- | 266 |
| TCsat13cl21a  | ..----- | 266 |
| DS497837.1-11 | ..----- | 266 |
| TCsat13cl24b  | ..----- | 266 |
| TCsat13cl155  | ..----- | 266 |
| TCsat13cl135  | ..----- | 266 |
| GG694187-1    | ..----- | 263 |
| DS497837.1-9  | ..----- | 266 |
| TCsat13cl129  | ..----- | 266 |
| TCsat13cl142  | ..----- | 266 |
| TCsat13cl14a  | ..----- | 266 |
| TCsat13cl15b  | ..----- | 266 |
| GG694187-8    | ..----- | 266 |
| GG694187-3    | ..----- | 266 |
| GG694187-4    | ..----- | 266 |
| GG694187-9    | ..----- | 267 |
| GG694367-2    | ..----- | 266 |
| GG694367-6    | ..----- | 266 |
| DS497837.1-5  | ..----- | 266 |
| TCsat13cl149  | ..----- | 266 |
| GG694187-12   | ..----- | 266 |
| TCsat13cl14b  | ..----- | 265 |
| TCsat13cl113  | ..----- | 266 |
| DS497837.1-2  | ..----- | 266 |
| DS497837.1-7  | ..----- | 266 |
| TCsat13cl147  | ..----- | 266 |
| TCsat13cl121b | ..----- | 265 |
| TCsat13cl124a | ..----- | 266 |
| DS497837.1-8  | ..----- | 266 |
| DS497894.1-6  | ..----- | 266 |
| TCsat13cl141  | ..----- | 266 |
| GG694187-2    | ..----- | 266 |
| GG694187-7    | ..----- | 266 |
| DS497837.1-4  | ..----- | 265 |
| TCsat13cl138  | ..----- | 266 |
| TCsat13cl139  | ..----- | 266 |
| DS497837.1-12 | ..----- | 266 |
| DS497837.1-10 | ..----- | 266 |
| TCsat13cl126  | ..----- | 265 |
| TCsat13cl131  | ..----- | 265 |
| TCsat13cl152  | ..----- | 265 |
| TCsat13cl118b | ..----- | 266 |
| TCsat13cl118a | ..----- | 266 |
| TCsat13cl15a  | ..----- | 266 |
| TCsat13cl154  | ..----- | 266 |
| TCsat13cl132  | ..----- | 266 |
| DS497894.1-3  | ..----- | 266 |
| GG694367-4    | ..----- | 266 |
| DS497837.1-6  | ..----- | 266 |
| TCsat13cl140  | ..----- | 266 |
| TCsat13cl144  | ..----- | 266 |
| GG694367-9    | ..----- | 266 |
| DS497837.1-1  | ..----- | 266 |
| GG694187-5    | ..----- | 266 |
| GG694187-10   | ..----- | 266 |

DS497837.1-3 .- ---- 266  
GG694187-14 .- ---- 266  
TCsat13c127 .- ---- 265  
GG694187-17 .- ---- 266  
DS497894.1-2 .- ---- 266  
GG694187-16 .- ---- 266  
DS497894.1-4 .- ---- 266  
GG694367-5 .- ---- 266  
GG694367-1 .- ---- 266

### C) TCsat14

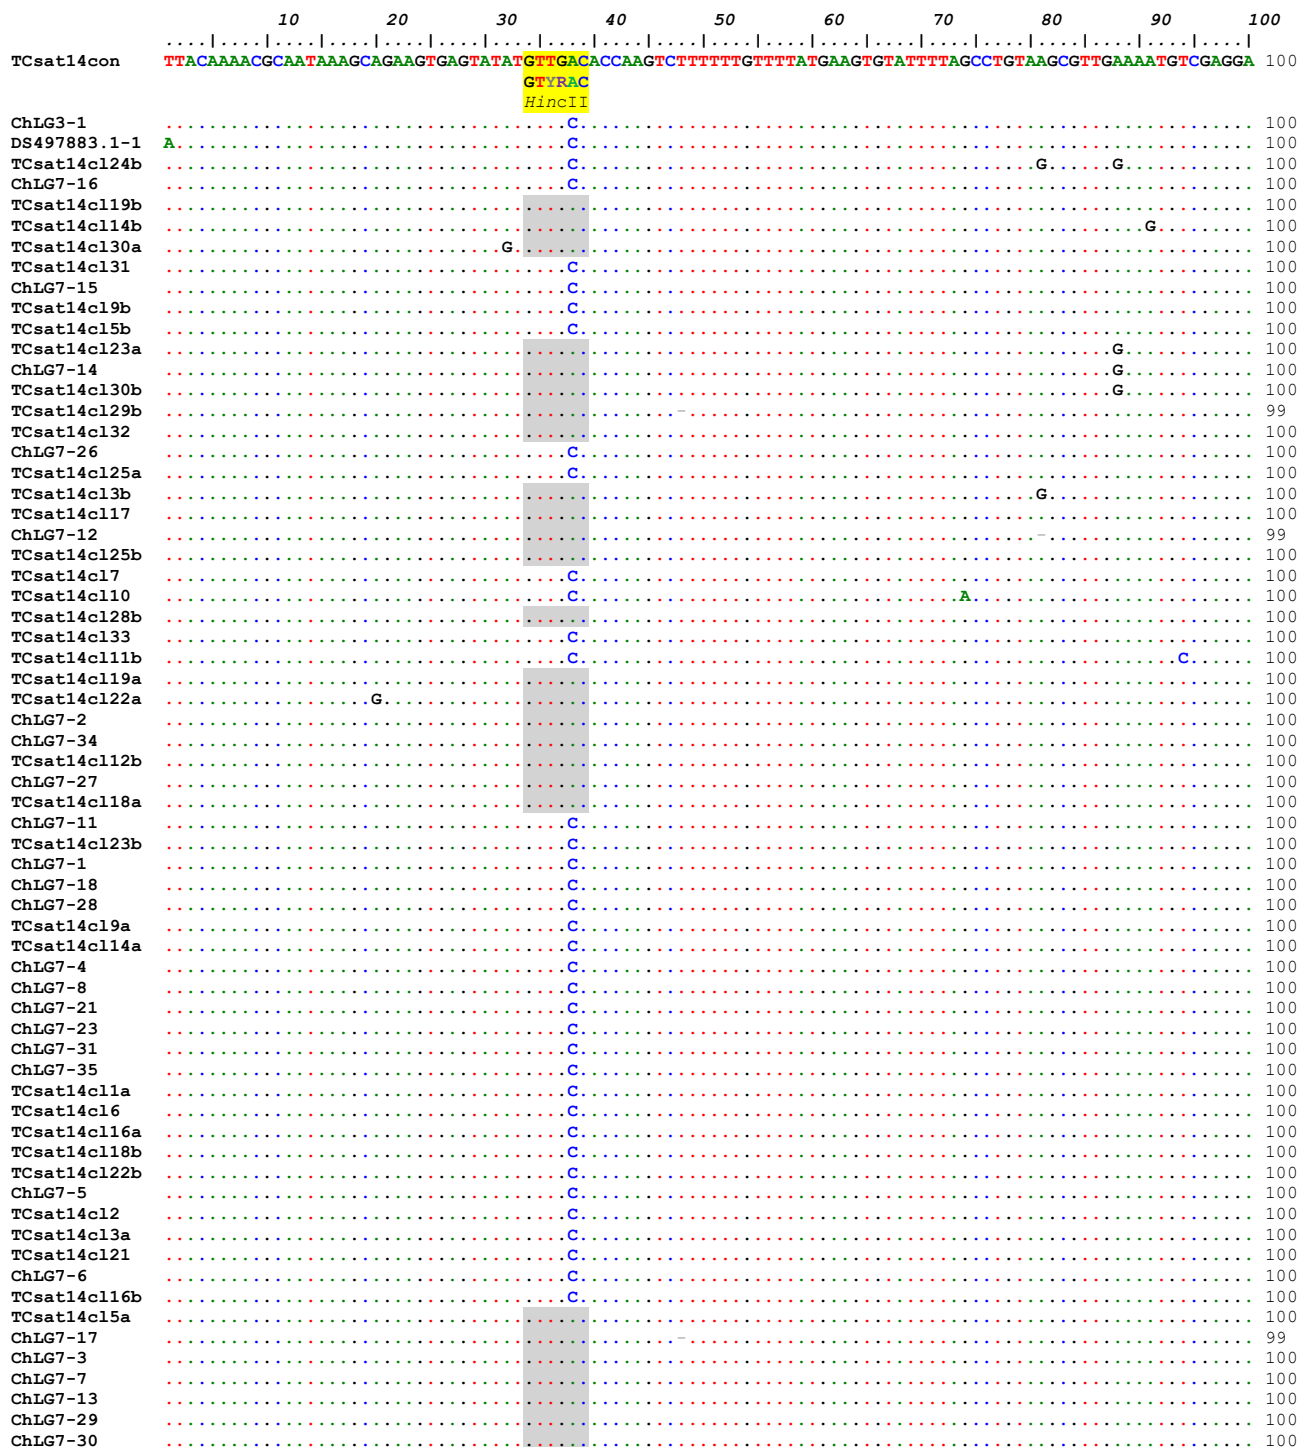









|              |       |     |
|--------------|-------|-----|
| ChLG7-7      | ..... | 310 |
| ChLG7-13     | ..... | 310 |
| ChLG7-29     | ..... | 310 |
| ChLG7-30     | ..... | 310 |
| ChLG7-32     | ..... | 310 |
| TCsat14cl1b  | ..... | 310 |
| TCsat14cl11a | ..... | 310 |
| TCsat14cl24a | ..... | 310 |
| TCsat14cl26  | ..... | 310 |
| TCsat14cl35  | ..... | 310 |
| ChLG7-9      | ..... | 312 |
| ChLG7-22     | ..... | 312 |
| ChLG7-33     | ..... | 312 |
| ChLG7-10     | ..... | 309 |
| ChLG7-20     | ..... | 309 |
| ChLG7-24     | ..... | 309 |
| ChLG7-25     | ..... | 309 |
| TCsat14cl12a | ..... | 309 |
| TCsat14cl29a | ..... | 309 |
| TCsat14cl34  | ..... | 309 |
| ChLG7-19     | ..... | 311 |
| TCsat14cl28a | ..... | 311 |

**Figure S6.** The alignments of TCsat12 (**A**), TCsat13 (**B**), and TCsat14 (**C**) monomers. The consensus sequences representing the most prevailing nucleotide at each position are listed as the first sequences. Monomers extracted from the Tcas5.2 assembly are labeled “ChLG” (chromosome linkage groups), “DD” (unplaced scaffolds) or “GG” (unplaced singletons). PCR-generated copies are designated as “TCsat12/13/14” followed by the clone number, and the suffixes “a” and “b” denote two monomeric copies obtained from the same cloned insert. Identities between the compared monomers and the consensus sequence are indicated by dots (.), and dashes (-) indicate alignment gaps. The yellow boxes in the consensus sequences mark recognition sites for specific restriction endonucleases, and the corresponding positions in the monomers are indicated by gray boxes.
