# Supplementary material for: The Low-Copy-Number Satellite DNAs of the Model Beetle Tribolium castaneum
Source: MDPI journal article supplement (doi:10.3390/genes14050999), 2023-04-28
Supplement: s1 [file s1]

**Table S1.** The output of seven clustering analyses (T1-T7) performed by the TAREAN pipeline using Illumina paired-end whole genome sequence reads of the red flour beetle *T. castaneum*. The suffixes “H” and “L” in the cluster numbers indicate the status of satellite repeats identified as “High putative” and “Low putative” by the TAREAN analysis, respectively.

| TAREAN clustering analysis                   |                          | T1               |                    | T2               |                    | T3               |                    | T4                 |                    | T5                 |                    | T6                 |                    | T7*                        |                    |
|----------------------------------------------|--------------------------|------------------|--------------------|------------------|--------------------|------------------|--------------------|--------------------|--------------------|--------------------|--------------------|--------------------|--------------------|----------------------------|--------------------|
| No. of analysed reads                        |                          | 230,000          |                    | 575,000          |                    | 1,150,000        |                    | 1,500,000          |                    | 1,720,000          |                    | 2,300,000          |                    | 1,500,000<br>(**1,197,688) |                    |
| Genome coverage                              |                          | 0.1x             |                    | 0.25x            |                    | 0.5x             |                    | 0.65x              |                    | 0.75x              |                    | 1x                 |                    | 0.65x                      |                    |
| No. of automatically filtered abundand reads |                          | 35,542 (15.45%)  |                    | 88,012 (15.31%)  |                    | 176,984 (15.39%) |                    | 307,506 (20.5%)    |                    | 349,298 (20.31%)   |                    | 353,592 (15.37%)   |                    | 30,2312*** (20.15%)        |                    |
| Proportion of reads in top clusters          |                          | 20%              |                    | 25%              |                    | 27%              |                    | 24%                |                    | 24%                |                    | 31%                |                    | 24%                        |                    |
| No. of reads in clusters                     |                          | 105,545 (45.89%) |                    | 308,282 (53.61%) |                    | 719,077 (62.53%) |                    | 1,013,181 (67.55%) |                    | 1,186,942 (69.00%) |                    | 1,708,455 (74.28%) |                    | 1,019,277 (69.63%)         |                    |
| No. of clusters                              |                          | 8,601            |                    | 32,304           |                    | 93,308           |                    | 139,090            |                    | 167,962            |                    | 248,696            |                    | 145,696                    |                    |
| No. of singlets                              |                          | 124,455          |                    | 266,718          |                    | 430,923          |                    | 486,819            |                    | 533,058            |                    | 591,545            |                    | 455,613                    |                    |
| No. of satellites                            |                          | 12               |                    | 19               |                    | 26               |                    | 49                 |                    | 47                 |                    | 72                 |                    | 37                         |                    |
| No. of high putative satellites              |                          | 2                |                    | 3                |                    | 3                |                    | 7                  |                    | 7                  |                    | 7                  |                    | 16                         |                    |
| No. of low putative satellites               |                          | 10               |                    | 16               |                    | 23               |                    | 42                 |                    | 40                 |                    | 65                 |                    | 21                         |                    |
| Satellite DNA                                | Average genome content % | Cluster          | Genome content (%) | Cluster          | Genome content (%) | Cluster          | Genome content (%) | Cluster            | Genome content (%) | Cluster            | Genome content (%) | Cluster            | Genome content (%) | Cluster                    | Genome content (%) |
| TCsat12                                      | 0.0461                   | 54H              | 0.0490             | 64L              | 0.0510             | 71L              | 0.0480             | 88L                | 0.0470             | 82L                | 0.0540             | 84L                | 0.0500             | 121H                       | 0.0240             |
| TCsat13                                      | 0.0184                   | 102L             | 0.0170             | 104L             | 0.0180             | 110L             | 0.0190             | 136L               | 0.0180             | 148L               | 0.0160             | 124L               | 0.0230             | 143H                       | 0.0180             |
| TCsat14                                      | 0.0154                   | 95L              | 0.0190             | 137L             | 0.0120             | 129H             | 0.0150             | 157L               | 0.0120             | 152L               | 0.0160             | 148L               | 0.0130             | 131L                       | 0.0210             |
| TCsat15                                      | 1.6857                   | 4L               | 1.6000             | 4L               | 1.7000             | 4L               | 1.7000             | 2L                 | 1.7000             | 2L                 | 1.7000             | 3L                 | 1.8000             | 2L                         | 1.6000             |
| TCsat16                                      | 0.0059                   | -                |                    | 239H             | 0.0061             | 282H             | 0.0044             | 231H               | 0.0060             | 273H               | 0.0041             | 185H               | 0.0057             | 204H                       | 0.0088             |
| TCsat17                                      | 0.0077                   | -                |                    | 168L             | 0.0092             | 244L             | 0.0055             | 223L               | 0.0065             | 191L               | 0.0091             | 165L               | 0.0084             | 226H                       | 0.0073             |
| TCsat18                                      | 0.0892                   | -                |                    | 48L              | 0.0800             | 48L              | 0.0960             | 55L                | 0.0950             | 55L                | 0.0920             | -                  |                    | 210H                       | 0.0830             |
| TCsat19                                      | 0.0174                   | -                |                    | -                |                    | 123L             | 0.0160             | 142L               | 0.0160             | 136L               | 0.0180             | 142L               | 0.0160             | 129L                       | 0.0210             |
| TCsat20                                      | 0.0045                   | -                |                    | -                |                    | 286L             | 0.0043             | 275H               | 0.0042             | 299L               | 0.0035             | 224L               | 0.0041             | 251H                       | 0.0063             |
| TCsat21                                      | 0.0041                   | -                |                    | -                |                    | 276L             | 0.0045             | 253L               |                    | 291L               | 0.0037             | 225L               | 0.0041             | 343H                       | 0.0040             |
| TCsat22                                      | 0.0040                   | -                |                    | -                |                    | -                |                    | 367H               | 0.0029             | 326L               | 0.0032             | 245L               | 0.0036             | 258L                       | 0.0061             |
| TCsat23                                      | 0.0078                   | 153L             | 0.0100             | 277L             | 0.0052             | 197L             | 0.0078             | 196L               | 0.0081             | -                  |                    | -                  |                    | -                          |                    |
| TCsat24                                      | 0.0898                   | -                |                    | 56L              | 0.0660             | -                |                    | 52L                | 0.0980             | 52L                | 0.0980             | 58L                | 0.0970             | -                          |                    |
| TCsat25                                      | 0.0027                   | -                |                    | -                |                    | 405L             | 0.0025             | 337L               | 0.0032             | 410L               | 0.0023             | 291H               | 0.0027             | -                          |                    |
| TCsat26                                      | 0.0030                   | -                |                    | -                |                    | 340L             | 0.0033             | -                  |                    | 371L               | 0.0026             | 318L               | 0.0024             | 360H                       | 0.0038             |

|         |        |   |   |      |        |       |        |        |        |        |        |        |
|---------|--------|---|---|------|--------|-------|--------|--------|--------|--------|--------|--------|
| TCsat27 | 0.0040 | - | - | -    | -      | -     | 341H   | 0.0030 | 254L   | 0.0033 | 270H   | 0.0058 |
| TCsat28 | 0.0036 | - | - | -    | -      | 297L  | 0.0038 | 307H   | 0.0034 | 239H   | 0.0037 | -      |
| TCsat29 | 0.0028 | - | - | -    | -      | -     | -      | 275L   | 0.0041 | 314L   | 0.0025 | 629L   |
| TCsat30 | 0.0019 | - | - | -    | -      | 447L  | 0.0022 | 532L   | 0.0016 | 404L   | 0.0020 | -      |
| TCsat31 | 0.0018 | - | - | -    | -      | 543L  | 0.0017 | 433L   | 0.0021 | 477L   | 0.0017 | -      |
| TCsat32 | 0.0033 | - | - | -    | -      | 344L  | 0.0031 | -      | -      | 277L   | 0.0030 | 365L   |
| TCsat33 | 0.0017 | - | - | 564L | 0.0017 | 625H  | 0.0015 | -      | -      | 418L   | 0.0019 | -      |
| TCsat34 | 0.0020 | - | - | -    | -      | -     | -      | 561L   | 0.0016 | 472L   | 0.0017 | 465H   |
| TCsat35 | 0.0018 | - | - | -    | -      | 466L  | 0.0021 | 557H   | 0.0016 | 497L   | 0.0017 | -      |
| TCsat36 | 0.0020 | - | - | 425L | 0.0023 | 518L  | 0.0018 | -      | -      | 447L   | 0.0018 | -      |
| TCsat37 | 0.0470 | - | - | -    | -      | CL87L | 0.0470 | 87L    | 0.0470 | -      | -      | -      |
| TCsat38 | 0.0070 | - | - | 153L | 0.0110 | -     | -      | -      | -      | -      | -      | 430L   |
| TCsat39 | 0.0018 | - | - | -    | -      | 428L  | 0.0023 | -      | -      | 598L   | 0.0013 | -      |
| TCsat40 | 0.0020 | - | - | -    | -      | 570L  | 0.0017 | -      | -      | -      | -      | 514H   |
| TCsat41 | 0.0016 | - | - | -    | -      | 505L  | 0.0019 | -      | -      | 636L   | 0.0013 | -      |
| TCsat42 | 0.0016 | - | - | -    | -      | -     | -      | 602L   | 0.0014 | -      | -      | 637L   |
| TCsat43 | 0.0016 | - | - | -    | -      | 647L  | 0.0015 | -      | -      | 487L   | 0.0017 | -      |
| TCsat44 | 0.0021 | - | - | -    | -      | -     | -      | -      | -      | 408L   | 0.0019 | 522H   |
| TCsat45 | 0.0017 | - | - | -    | -      | -     | -      | -      | -      | 747L   | 0.0011 | 509H   |
| TCsat46 | 0.0017 | - | - | -    | -      | 452L  | 0.0021 | -      | -      | 614L   | 0.0013 | -      |
| TCsat47 | 0.0019 | - | - | -    | -      | 596L  | 0.0016 | 430L   | 0.0022 | -      | -      | -      |
| TCsat48 | 0.0017 | - | - | -    | -      | 467L  | 0.0021 | -      | -      | 641L   | 0.0013 | -      |
| TCsat49 | 0.0017 | - | - | -    | -      | 500L  | 0.0019 | -      | -      | 561L   | 0.0014 | -      |
| TCsat50 | 0.0024 | - | - | -    | -      | 419L  | 0.0024 | -      | -      | -      | -      | -      |
| TCsat51 | 0.0043 | - | - | -    | -      | 271L  | 0.0043 | -      | -      | -      | -      | -      |
| TCsat52 | 0.0013 | - | - | -    | -      | 686L  | 0.0013 | -      | -      | -      | -      | -      |
| TCsat53 | 0.0017 | - | - | -    | -      | 540L  | 0.0017 | -      | -      | -      | -      | -      |
| TCsat54 | 0.0022 | - | - | -    | -      | -     | -      | -      | -      | -      | -      | 541L   |
| TCsat55 | 0.0023 | - | - | -    | -      | -     | -      | -      | -      | -      | -      | 524L   |
| TCsat56 | 0.0024 | - | - | -    | -      | -     | -      | -      | -      | -      | -      | 499L   |
| TCsat57 | 0.0013 | - | - | -    | -      | 698L  | 0.0013 | -      | -      | -      | -      | -      |

\* For TAREAN clustering analysis T7, an initial subset of 1,500,000 randomly subsampled Illumina reads was selected.

\*\* Using Geneious Prime software, the reads belonging to the major satDNA TCAST were excluded from the initial subset of 1,500,000 reads, and the remaining 1,197,688 TCAST-free reads were subjected to the TAREAN analysis.

\*\*\* In the initial subset of 1,500,000 Illumina reads, 302,312 reads were recognized as the reads belonging to the major satDNA TCAST by Geneious Mapper tool. The TCAST-related reads were excluded from the subsequent clustering analysis.
