# Supplementary material for: The Low-Copy-Number Satellite DNAs of the Model Beetle Tribolium castaneum
Source: MDPI journal article supplement (doi:10.3390/genes14050999), 2023-04-28
Supplement: s1 [file s1]

**Table S7.** Origin and number of TCsat12, TCsat13, and TCsat14 monomers used in phylogenetic analyses.

|                                                                  | <b>TCsat12</b> | <b>TCsat13</b> | <b>TCsat14</b> |
|------------------------------------------------------------------|----------------|----------------|----------------|
| <i>Cloned PCR-dimers</i><br>(containing one full-size monomer)   | 13             | 24             | 12             |
| <i>Cloned PCR-trimers</i><br>(containing two full-size monomers) | 9              | 5              | 17             |
| Extracted PCR monomers                                           | 31             | 34             | 46             |
| Monomers from assembled contigs                                  | 4              | -              | 36             |
| Monomers from unplaced scaffolds                                 | 7              | 19             | 1              |
| Monomers from unplaced singletons                                | 71             | 31             | -              |
| <b>Total number of analyzed monomers</b>                         | <b>113</b>     | <b>84</b>      | <b>83</b>      |
