# Supplementary material for: The Low-Copy-Number Satellite DNAs of the Model Beetle Tribolium castaneum
Source: MDPI journal article supplement (doi:10.3390/genes14050999), 2023-04-28
Supplement: s1 [file s1]

**Table S3.** Main characteristics of the 46 *T. castaneum* satDNAs identified in this work. The data on monomers' length, AT content, nucleotide divergence, and tandem/scattered organization have been based on the repeats annotated in the current reference genome of *T. castaneum*<sup>a</sup>. The names of satellite DNAs whose repeat units were found only in tandem organization are shaded in gray.

| SatDNA  | Genomic abundance <sup>b</sup> (%) | Monomer consensus length (bp) | Mean monomer length (bp)±SD (min-max) | AT content (%) | Nucleotide divergence (%) | Expected No. of monomers <sup>c</sup> | No. of annotated monomers <sup>d</sup> | No. of repeats in arrays of ≥5 tandem copies / No. of arrays with ≥5 tandem copies | No. of scattered repeats | No. of tandem repeats in the longest array | Partial similarity to Repbase entries        | Annotation according to Wang et al. <sup>e</sup> |
|---------|------------------------------------|-------------------------------|---------------------------------------|----------------|---------------------------|---------------------------------------|----------------------------------------|------------------------------------------------------------------------------------|--------------------------|--------------------------------------------|----------------------------------------------|--------------------------------------------------|
| TCsat12 | 0.0461                             | 154                           | 152.6±3.2 (142-157)                   | 68.7           | 10.5                      | 611                                   | 82                                     | 78 / 4                                                                             | 4                        | 39                                         | -                                            | -                                                |
| TCsat13 | 0.0184                             | 266                           | 266.8±4.4 (263-288)                   | 69.6           | 12.4                      | 141                                   | 50                                     | 50 / 4                                                                             | -                        | 21                                         | -                                            | -                                                |
| TCsat14 | 0.0154                             | 309                           | 309.9±1.1 (307-312)                   | 68.2           | 1.3                       | 102                                   | 37                                     | 35 / 2                                                                             | 2                        | 24                                         | HAT-14_Mad                                   | -                                                |
| TCsat15 | 1.6857                             | 1106                          | 1100.9±15.4 (1014-1163)               | 68.1           | 19.5                      | 3109                                  | 330                                    | 6 / 1                                                                              | 324                      | 6                                          | Academ-3_LMi<br>Transib-N1_CQ<br>Sola1-2_LMi | R=0 TRF=0.08<br> <br>NSEG=0.370 <br>HighB        |
| TCsat16 | 0.0059                             | 330                           | 329.6±1.9 (319-330)                   | 64.5           | 6.3                       | 36                                    | 34                                     | 34 / 1                                                                             | -                        | 34                                         | DNAX-1_TCa<br>Dada-tV_PeFlu                  | -                                                |
| TCsat17 | 0.0077                             | 120                           | 120.0±0.4 (117-120)                   | 60.3           | 11.0                      | 131                                   | 70                                     | 68 / 2                                                                             | 2                        | 36                                         | -                                            | -                                                |
| TCsat18 | 0.0892                             | 73                            | 71.7±4.3 (61-83)                      | 64.0           | 25.4                      | 2493                                  | 969                                    | 424 / 23                                                                           | 545                      | 84                                         | -                                            | -                                                |
| TCsat19 | 0.0174                             | 618                           | 606.0±22.7 (553-639)                  | 68.6           | 13.7                      | 57                                    | 43                                     | 31 / 4                                                                             | 12                       | 11                                         | MuDR-7_Cas                                   | R=121 TRF=0.000<br> NSEG=0.328 <br>Mid           |
| TCsat20 | 0.0045                             | 144                           | 144.5±1.7 (143-150)                   | 68.3           | 2.3                       | 64                                    | 24                                     | 24 / 1                                                                             | -                        | 24                                         | -                                            | -                                                |
| TCsat21 | 0.0041                             | 102                           | 102.4±1.0 (101-105)                   | 70.8           | 4.2                       | 82                                    | 30                                     | 30 / 1                                                                             | -                        | 30                                         | HipGal-6.520                                 | -                                                |
| TCsat22 | 0.0040                             | 281                           | 280.9±0.3 (280-281)                   | 69.9           | 1.5                       | 29                                    | 20                                     | 20 / 1                                                                             | -                        | 20                                         | -                                            | -                                                |
| TCsat23 | 0.0078                             | 164                           | 162.9±3.5 (135-165)                   | 70.1           | 7.4                       | 97                                    | 68                                     | 58 / 8                                                                             | 10                       | 9                                          | Rehavkus-1_TC                                | R=3600 TRF=0.000 NSEG=0.382 Mid                  |
| TCsat24 | 0.0898                             | 721                           | 718.1±19.9 (653-762)                  | 67.1           | 10.9                      | 254                                   | 23                                     | 6 / 1                                                                              | 17                       | 6                                          | CerCot-5.769<br>EnSpm-N2_DaCa                | R=242 TRF=0.000 NSEG=0.342 Mid                   |
| TCsat25 | 0.0027                             | 258                           | 258.2±1.5 (256-261)                   | 70.7           | 5.9                       | 21                                    | 25                                     | 25 / 1                                                                             | -                        | 25                                         | -                                            | -                                                |
| TCsat26 | 0.0030                             | 361                           | 363.0±1.1 (361-365)                   | 77.2           | 6.8                       | 17                                    | 20                                     | 20 / 2                                                                             | -                        | 10                                         | Transib-3_DTa<br>Gypsy-54_MT-I               | R=4675 TRF=0.000 NSEG=0.433 Low                  |
| TCsat27 | 0.0040                             | 302                           | 298.7±11.0 (248-304)                  | 67.7           | 9.5                       | 27                                    | 48                                     | 48 / 2                                                                             | -                        | 24                                         | Gypsy-22_DMeI-I                              | -                                                |
| TCsat28 | 0.0036                             | 412                           | 410.7±4.7 (400-414)                   | 76.4           | 5.2                       | 18                                    | 7                                      | 7 / 1                                                                              | -                        | 7                                          | MuDR-18_Cas<br>EnSpm-14_Rlr                  | -                                                |
| TCsat29 | 0.0028                             | 177                           | 176.1±0.6 (174-177)                   | 70.8           | 11.8                      | 32                                    | 44                                     | 42 / 2                                                                             | 2                        | 21                                         | -                                            | -                                                |

|                |        |     |                         |      |      |     |     |         |     |    |                                                       |                                                                                    |
|----------------|--------|-----|-------------------------|------|------|-----|-----|---------|-----|----|-------------------------------------------------------|------------------------------------------------------------------------------------|
| <b>TCsat30</b> | 0.0019 | 90  | 90.4±1.3<br>(90-96)     | 59.2 | 19.7 | 43  | 29  | 25 / 2  | 4   | 17 | -                                                     | -                                                                                  |
| <b>TCsat31</b> | 0.0018 | 144 | 144.6±2.1<br>(140-148)  | 70.4 | 4.5  | 26  | 25  | 25 / 1  | -   | 25 | -                                                     | -                                                                                  |
| <b>TCsat32</b> | 0.0033 | 325 | 308.8±35.1<br>(230-326) | 69.5 | 10.4 | 21  | 18  | 18 / 1  | -   | 18 | -                                                     | R=2222 TRF=<br>0.000 NSEG=<br>0.308 Mid                                            |
| <b>TCsat33</b> | 0.0017 | 150 | 149.7±0.7<br>(148-150)  | 72.0 | 8.1  | 23  | 6   | 6 / 1   | -   | 6  | DNA/Mariner                                           | -                                                                                  |
| <b>TCsat34</b> | 0.0020 | 203 | 203.6±1.1<br>(202-206)  | 69.7 | 3.0  | 20  | 9   | 9 / 1   | -   | 9  | -                                                     | -                                                                                  |
| <b>TCsat35</b> | 0.0018 | 172 | 172.4±0.8<br>(172-175)  | 79.2 | 3.2  | 21  | 13  | 13 / 1  | -   | 13 | -                                                     | -                                                                                  |
| <b>TCsat36</b> | 0.0020 | 178 | 178.2±1.3<br>(175-181)  | 72.6 | 11.1 | 23  | 13  | 10 / 1  | 3   | 10 | Helitron-<br>N2 HMM                                   | -                                                                                  |
| <b>TCsat37</b> | 0.0470 | 230 | 258.9±45.4<br>(195-347) | 71.6 | 33.9 | 417 | 235 | 115 / 8 | 120 | 51 | Mariner-32_RPr                                        | -                                                                                  |
| <b>TCsat38</b> | 0.0070 | 178 | 177.8±2.4<br>(170-181)  | 71.0 | 26.1 | 80  | 88  | 46 / 2  | 42  | 23 | -                                                     | R=1576 TRF=<br>0.000 NSEG=<br>0.081 Mid<br>R=3912 TRF=<br>0.000 NSEG=<br>0.103 Low |
| <b>TCsat39</b> | 0.0018 | 188 | 191.7±3.8<br>(188-197)  | 73.0 | 7.4  | 20  | 26  | 26 / 1  | -   | 26 | -                                                     | -                                                                                  |
| <b>TCsat40</b> | 0.0020 | 276 | 275.8±1.6<br>(272-278)  | 74.5 | 5.0  | 15  | 10  | 10 / 1  | -   | 10 | -                                                     | R=4888 TRF=<br>0.000 NSEG=<br>0.000 Low                                            |
| <b>TCsat41</b> | 0.0016 | 122 | 122.1±1.1<br>(120-123)  | 71.4 | 7.1  | 27  | 20  | 20 / 1  | -   | 20 | -                                                     | R=4460 TRF=<br>0.000 NSEG=<br>0.314 Low                                            |
| <b>TCsat42</b> | 0.0016 | 179 | 178.2±3.6<br>(162-180)  | 70.7 | 11.2 | 18  | 22  | 19 / 1  | 3   | 19 | Gypsy-7_TCa-I                                         | -                                                                                  |
| <b>TCsat43</b> | 0.0016 | 178 | 177.9±0.3<br>(177-178)  | 69.4 | 3.3  | 18  | 18  | 18 / 1  | -   | 18 | ARNOLDY2                                              | -                                                                                  |
| <b>TCsat44</b> | 0.0021 | 311 | 307.7±5.2<br>(296-312)  | 68.4 | 3.2  | 14  | 16  | 16 / 1  | -   | 16 | -                                                     | -                                                                                  |
| <b>TCsat45</b> | 0.0017 | 260 | 260.0±0.6<br>(259-261)  | 73.5 | 4.3  | 13  | 6   | 6 / 1   | -   | 6  | COPIA3-I_MT                                           | -                                                                                  |
| <b>TCsat46</b> | 0.0017 | 142 | 141.9±0.9<br>(140-143)  | 76.6 | 4.4  | 24  | 15  | 15 / 1  | -   | 15 | -                                                     | -                                                                                  |
| <b>TCsat47</b> | 0.0019 | 282 | 283.8±5.4<br>(281-297)  | 76.0 | 6.8  | 14  | 13  | 11 / 1  | 2   | 11 | hAT-N20_ALy                                           | -                                                                                  |
| <b>TCsat48</b> | 0.0017 | 156 | 149.9±10.9<br>(130-159) | 72.4 | 15.8 | 22  | 7   | 7 / 1   | -   | 7  | Polinton-2_HM                                         | -                                                                                  |
| <b>TCsat49</b> | 0.0017 | 354 | 354±3.7<br>(350-361)    | 76.4 | 6.8  | 10  | 5   | 5 / 1   | -   | 5  | Gypsy-6B_AIBr-<br>I hAT-26_DTa                        | -                                                                                  |
| <b>TCsat50</b> | 0.0024 | 168 | 168.3±0.7<br>(167-170)  | 77.4 | 14.0 | 29  | 19  | 19 / 2  | -   | 12 | Gypsy-45_PAb-I                                        | -                                                                                  |
| <b>TCsat51</b> | 0.0043 | 353 | 352.4±4.2<br>(340-354)  | 76.9 | 13.2 | 25  | 10  | 6 / 1   | 4   | 6  | Gypsy-671_AA-<br>IMuDRx-3_TV<br>Helitron-<br>N60B_CGi | -                                                                                  |
| <b>TCsat52</b> | 0.0013 | 184 | 183.8±1.4<br>(181-187)  | 66.8 | 19.8 | 14  | 34  | 34 / 4  | -   | 10 | Academ-10_LMi                                         | -                                                                                  |
| <b>TCsat53</b> | 0.0017 | 152 | 151.9±2.3<br>(149-157)  | 74.9 | 11.8 | 23  | 11  | 11 / 1  | -   | 11 | MuDR-2_GAr                                            | -                                                                                  |

|                |        |     |                        |      |     |    |   |       |   |   |                                                           |   |
|----------------|--------|-----|------------------------|------|-----|----|---|-------|---|---|-----------------------------------------------------------|---|
| <b>TCsat54</b> | 0.0022 | 322 | 321.3±1.6<br>(318-323) | 77.6 | 8.0 | 14 | 9 | 6 / 1 | 3 | 6 | HARB-N1_TC<br>Gypsy-122_NS-<br>LTR<br>Gypsy-27_DWIl-<br>I | - |
| <b>TCsat55</b> | 0.0023 | 311 | 311.0±0.0<br>(311)     | 73.3 | 3.9 | 15 | 5 | 5 / 1 | - | 5 | DNA-1_CQ                                                  | - |
| <b>TCsat56</b> | 0.0024 | 306 | 306.2±0.4<br>(306-307) | 70.8 | 5.3 | 16 | 5 | 5 / 1 | - | 5 | Harbinger-<br>21_OS                                       | - |
| <b>TCsat57</b> | 0.0013 | 212 | 210.2±2.0<br>(208-214) | 80.1 | 4.1 | 13 | 5 | 5 / 1 | - | 5 | -                                                         | - |

<sup>a</sup> Herndon et al (2020) BMC Genomics 21:47

<sup>b</sup> An average value of genomic abundance based on TAREAN analyzes shown in Table S1.

<sup>c</sup> Expected number of monomers in the genome was calculated according to the estimated genome size of *T. castaneum* of 204 Mb (Brown et al (1990) Insect Biochem 20:185-193) and the TAREAN estimates of satDNA genome abundance.

<sup>d</sup> Monomeric repeats annotated in the genome assembly Tcas5.2, as well as in unplaced scaffolds (GenBank accessions DS497665-DS497969) and unplaced singletons (GenBank accessions GG694051-GG695898).

<sup>e</sup> Wang et al (2008) Genome Biol. 9(3):R61.
