# Supplementary material for: The Low-Copy-Number Satellite DNAs of the Model Beetle Tribolium castaneum
Source: MDPI journal article supplement (doi:10.3390/genes14050999), 2023-04-28
Supplement: s1 [file s1]

**A)**

## TCsat14

| SatDNA  | From | To  | Rebase     | From | To   | Dir | Sim    | Pos/Mm:Ts | Score |
|---------|------|-----|------------|------|------|-----|--------|-----------|-------|
| TCsat14 | 168  | 227 | HAT-14_Mad | 1525 | 1587 | c   | 0.7903 | 1.2857    | 242   |

168 ATTTCCACAAAAA--AGTGTG-GTTCAGTTCTAAATATTTTACAAT--AATTTAACTTTTTTAG 227  
 |||||:||||:--||||-||:|--|||||||:||||--|||:||||: |||  
 1587 ATTTCCACGAAAGCCAGTGTGTGTTAG--CTAAATATTTACAATGGAAATCAACCTTCGTAG 1525

## TCsat15

| SatDNA  | From | To  | Rebase       | From | To | Dir | Sim    | Pos/Mm:Ts | Score |
|---------|------|-----|--------------|------|----|-----|--------|-----------|-------|
| TCsat15 | 495  | 522 | Academ-3_LMi | 72   | 99 | c   | 0.9643 | 1.0000    | 244   |

495 TCGGAAAGAGCACATCAAATCTATAAG 522  
 |||:||||||||||||||||||  
 99 TCGAAAAGAGCACATCAAATCTATAAG 72

| SatDNA  | From | To  | Rebase        | From | To  | Dir | Sim    | Pos/Mm:Ts | Score |
|---------|------|-----|---------------|------|-----|-----|--------|-----------|-------|
| TCsat15 | 663  | 693 | Transib-N1_CQ | 908  | 938 | c   | 0.8710 | 1.3333    | 213   |

663 CCTATGCAAAATGATCCGGGGAATCGATTGG 693  
|:||||:|||| :|||||||  
938 CTTATGTAAAAAATCCGGGGAATCGATTGG 908

| SatDNA  | From | To   | Rebase      | From | To   | Dir | Sim    | Pos/Mm:Ts | Score |
|---------|------|------|-------------|------|------|-----|--------|-----------|-------|
| TCsat15 | 1037 | 1102 | Sola1-2 LMi | 1445 | 1506 | d   | 0.7846 | 2.0000    | 203   |

1037 AAAAAATTTACTGGAGTGAGTTTAAAAAAAAATTTTTTTTACCT-CTTGAAAGTTAAGTGATTATT 1102  
| | | | | | | | | | : | - | | --- | | | | | | | | | | : | : | - | : | | | | | | - | | | | | : | |  
1445 AAAAAATTTACTGAA-TG---TTAATAATACATTTTTTTTTTACTTTCTCTGAACTTT-GTGTATTGTT 1506

## TCsat16

| SatDNA  | From | To  | Rebase     | From | To   | Dir | Sim    | Pos/Mm:Ts | Score |
|---------|------|-----|------------|------|------|-----|--------|-----------|-------|
| TCsat16 | 148  | 184 | DNAX-1_TCa | 1481 | 1517 | c   | 0.9189 | 1.0000    | 308   |

148 TGTACAGGGTGCCGATTTTGGATATCCGAATAGGAG 184  
 |||||:|||||:|||||:|  
 1517 TGTACAGGGTGCTGCATTTTGGATGTCCGAATAGGGG 1481

| SatDNA  | From | To  | Rebase        | From | To   | Dir | Sim    | Pos/Mm:Ts | Score |
|---------|------|-----|---------------|------|------|-----|--------|-----------|-------|
| TCsat16 | 208  | 285 | Dada-tV_PeFlu | 7776 | 7849 | d   | 0.7200 | 1.5833    | 234   |

208 ATGCAATAAAAAATTGTACTACTGCTAAATCGAATCCAAC TTGTTCAATTAACAGTAAATATATGTATC- 276  
| | : | | | | | - - - - | | | | | : | : | | : | : | | | | | | | | | | : | | | : | : | | | | | | | -  
7776 ATACAATAA-----TG TACTATTATTAAGTTGAATTCAACTTTTTACCAGTAGCAGCATGTAAAAGTATTA 7840

277 TTGTCACAA 285  
| | | | | : | |  
7841 TTGTCATAA 7849

## TCsat19

| SatDNA  | From | To | Rebase     | From | To   | Dir | Sim    | Pos/Mm:Ts | Score |
|---------|------|----|------------|------|------|-----|--------|-----------|-------|
| TCsat19 | 13   | 77 | MuDR-7_Cas | 8094 | 8155 | c   | 0.7778 | 1.7143    | 246   |

13 GTTATT-TATCGAAATTTGTATACTGATCTTGATTTTTTTATTTTCAGTAGGCTCTATTCTAAGA 77  
 ||||| - ||| ||:|||||----|| |:|||||||:|| |||: |:|||||:|| |||:|  
 8155 GTTATTGTATCTAAGATTTGT----TGCTTTTGATTTCTTTTTTTTTTGCAGGTCCATGCTAGGA 8094

## TCsat21

| SatDNA  | From | To | Rebase       | From | To  | Dir | Sim    | Pos/Mm:Ts | Score |
|---------|------|----|--------------|------|-----|-----|--------|-----------|-------|
| TCsat21 | 16   | 82 | HipGal-6.520 | 280  | 353 | c   | 0.7971 | 1.5000    | 220   |

```

16  AGTCGCAATAAAATTTGT-----TAATTTGAAAATAAAAT--TTAATTCGC---GCTTCAAATTAATAAAA 75
    ||  |||||:|:|:|-----|||  |||||-----:||||:-|---:||||---|||
353  AGGCGCAATGAATCTGTCAGATTAATTAGAAAATAAAATACCTAATT-ACTAAGTTTCAA--TAATAAAA 287

76  ATGTACT 82
    |:|
286  CTATACT 280

```

## TCsat23

| SatDNA  | From | To  | Rebase        | From | To   | Dir | Sim    | Pos/Mm:Ts | Score |
|---------|------|-----|---------------|------|------|-----|--------|-----------|-------|
| TCsat23 | 1    | 164 | Rehavkus-1_TC | 7923 | 8086 | c   | 0.9939 | 1.0000    | 1441  |

```

1 TTTAATATTATTAATAAAATGTTGACATATTTCAAAC TAAGGGTTGGATGTCTTCCCAAAC TTTTAGAGG 70
  |||
8086 TTTAATATTATTAATAAAATGTTGACATATTTCAAAC TAAGGGTTGGATGTCTTCCCAAAC TTTTAGAAG 8017

71 GTTGAAATTTTCAGGAAAGGTAGAGTATTTAATGGGCTTT CATGTGGAATGGGTTAAATGCGTCGACAAA 140
  |||
8016 GTTGAAATTTTCAGGAAAGGTAGAGTATTTAATGGGCTTT CATGTGGAATGGGTTAAATGCGTCGACAAA 7947

141 AAGAAATAGTACTAGAAAAAATA 164
  |||
7946 AAGAAATAGTACTAGAAAAAATA 7923

```

## TCsat24

| SatDNA  | From | To  | Rebase       | From | To  | Dir | Sim    | Pos/Mm:Ts | Score |
|---------|------|-----|--------------|------|-----|-----|--------|-----------|-------|
| TCsat24 | 94   | 122 | CerCot-5.769 | 495  | 523 | d   | 0.9310 | 99.0000   | 226   |

94 CCAGAGCGCATGCGCATGCGCGTCTGACC 122  
 ||||| ||||| |||||  
 495 CCAGAGCGCCTGCGCATGCGCGTGTGACC 523

| SatDNA  | From | To  | Rebase        | From | To   | Dir | Sim    | Pos/Mm:Ts | Score |
|---------|------|-----|---------------|------|------|-----|--------|-----------|-------|
| TCsat24 | 316  | 397 | EnSpm-N2_DaCa | 2493 | 2564 | d   | 0.8108 | 1.6000    | 211   |

```

316 TCACAAAGTCATG--ATTAAAAATTTTAAAGTTTTTTTAACTTAATCGATAGACATGCGCGTAAGATTAA 382
    |:|||||-----|||---|||---|||  || |:-----|::|| |||:|---
2493 TTACAAAGTCATGCAAATTTAA-TTTTAA--TTTTTTAAATTATTT-----CACACGCCTAAAT--- 2550

383 AAAAATA-ATTTTTAT 397
    --|||||---|||
2551 --AAATATATTTTTAT 2564

```

## TCsat26

| SatDNA  | From | To  | Rebase        | From | To   | Dir | Sim    | Pos/Mm:Ts | Score |
|---------|------|-----|---------------|------|------|-----|--------|-----------|-------|
| TCsat26 | 68   | 260 | Transib-3_DTa | 3053 | 3197 | d   | 0.7595 | 1.5625    | 241   |

```

68 TTGTAACCATCACTGATTCTAAAAATAACTGAAAAGATTTAAAGTTAAACGTTTTTATCTTCAAAGTAA 137
   |||:||||:|:|---||   ||||:--||||-----|---|:|||:-:|||||:|:|:|:-||
3053 TTGTGACCATTATT---TCAAAAAACA--TGAA-----TA-----TAAAA-ATTTTATTTTAAAA-AA 3106

138 ATATAGCTGTTAAATTTCTCTTTCTTTTTTTTGCAAGTGTCTGCTTAGTTTTCAAAAATTTTAATAAC 207
   |---|:| |--|||||:|:||||:|||||-----|||||:|||||   ||:|
3107 A---AACTTT--AATTTTTTTTTTTTTTTTTT-----TAGTTTTTAAAAATTAAACATA 3158

208 AAAATGCTTTAATAAAAAATTACTAATATAACACATAATTAAACTAAAACAAA 260
   |||-----|||||-----|||:-|:| |:|||| ||--||| |||
3159 AAAA-----AATAAA-----CTAA-ACAAAACGTAATTTAA--AAAAAAA 3197

```

| SatDNA  | From | To  | Repbse        | From | To   | Dir | Sim    | Pos/Mm:Ts | Score |
|---------|------|-----|---------------|------|------|-----|--------|-----------|-------|
| TCsat26 | 285  | 361 | Gypsy-54_MT-I | 1445 | 1515 | c   | 0.7397 | 1.3333    | 230   |

285

TTGTCAACTCGGCGCCTCCACCATTTTAAAT-TTTAGATATCCAACCAATTTACTTTCCTTACTTTTACT

353

|| |||:|:|:| ||::| ||||| |-||:||||:| |-----|:|:|||||:|||||

1515

TTCTCAATTCAATGACTTTGCGATTTTATTCTTTGGATATTCAAC-----ATTCTCCTTATTTTACT

1452

354

GTAAATGA

361

| -|||||

1451

G-AAATGA

1445

TCsat27

| SatDNA  | From | To | Repbse          | From | To   | Dir | Sim    | Pos/Mm:Ts | Score |
|---------|------|----|-----------------|------|------|-----|--------|-----------|-------|
| TCsat27 | 21   | 57 | Gypsy-22_DMeI-I | 4973 | 5009 | c   | 0.8649 | 1.6667    | 234   |

21

TTTTTCAAAGTTTTCTTGCTGTTTTTGTCATATTTT

57

|||||:| ||| |||||||||:|||||||:|

5009

TTTTTCGATGTTATCTTGCTGCTTTTGTCATATTCT

4973

TCsat28

| SatDNA  | From | To  | Repbse      | From | To   | Dir | Sim    | Pos/Mm:Ts | Score |
|---------|------|-----|-------------|------|------|-----|--------|-----------|-------|
| TCsat28 | 99   | 167 | MuDR-18_Cas | 1384 | 1454 | c   | 0.8000 | 5.0000    | 209   |

99

GTACAAAAAATTTTGAACATTATTGTTTGGTAAAATTTTAAA---ATTAACAGAC-GGTTTT-TTATTTT

163

||||| |: |||||||---||||||| | ||||| || |---||||| |:|-|||||-|||||

1454

GTACACAGTATTTTGAA---TATTGTTAGTTAAAAATTACAATGTATTAAGAAACTGGTTTTCTTATTTT

1388

164

TTTT

167

||||

1387

TTTT

1384

| SatDNA  | From | To  | Repbse       | From | To   | Dir | Sim    | Pos/Mm:Ts | Score |
|---------|------|-----|--------------|------|------|-----|--------|-----------|-------|
| TCsat28 | 216  | 342 | EnSpm-14_RIr | 5450 | 5579 | c   | 0.7460 | 1.9167    | 226   |

216

AATATACAGTTAAATACTTTAATGTG-TTTA---TTATTAAGTACTTGTAAAGAAAAACCTTTTATTTTTG

281

||||| ||||| |:| :||:|-|||---|||-----|::|| ||||| |||---|||||:

5579

AATATACTTTTAAAAATTGCAATATGATTTAAGCTTATT -----TTACAATAAAAAGCTT--ATTTTTA

5518

282

AC-TAA---GCTTAT-----GAAAAATTTATCACTTTTAAGTACAAAGAGTGTTTTATTTTAAAA-AACTT

342

| -|||---|||||---:||||:||||:--|| |:|| |||| |:|||||||---|

5517

AAATAAAAAGCTTATTTTAAAAAGCTTATT--TTTAAAAATAAAAAGCTTATTTTATTTTAAAAAACTT

5450

TCsat33

| SatDNA  | From | To  | Repbse         | From | To   | Dir | Sim    | Pos/Mm:Ts | Score |
|---------|------|-----|----------------|------|------|-----|--------|-----------|-------|
| TCsat33 | 89   | 132 | Mariner-5_DSuz | 1411 | 1454 | d   | 0.7955 | 1.8000    | 209   |

89

TTATCTTTTTCCAGGTCGAAGCCCAAAACTAATTATTTATGTC

132

||||:||||:| ||| :||:|||||||:||||| ||| |||

1411

TTATTTTTTCCAAGGTAAAAACCCAAAAATTAATCTTTAAGTC

1454

TCsat36

| SatDNA  | From | To  | Repbse          | From | To  | Dir | Sim    | Pos/Mm:Ts | Score |
|---------|------|-----|-----------------|------|-----|-----|--------|-----------|-------|
| TCsat36 | 64   | 132 | Helitron-N2_HMM | 738  | 811 | d   | 0.7500 | 2.1429    | 205   |

64

CGATGTTATCCAATCAAGACAGCGGAATTTT--TAACTTGGTGTTTTATTTGA-ATTTTTC--AGAATG

128

||||||| || |:|:|:| || |||||---| |:||| :|||||||---|| |||---|:|

738

CGATGTTATACACTTAAAATATCGTAATTTTAATCATTTGGGATTTTATTTGATATTGTCGCAAAAATT

807

• |||

## SatDN

|         |    |     |                |      |      |   |        |        |     |
|---------|----|-----|----------------|------|------|---|--------|--------|-----|
| TCsat37 | 92 | 204 | Mariner-32_RPr | 1618 | 1729 | c | 0.7455 | 1.9091 | 202 |
|---------|----|-----|----------------|------|------|---|--------|--------|-----|

| | | | | | | | | - - - | | : | | : | | | : | | | | | | | | : | | : | - - | : | | | | | - - - - | | | | | | | | -

## SatDM

| Source  | From | To  | Response      | From | To  | Lat | Gain   | Loss, rms, etc | Notes |
|---------|------|-----|---------------|------|-----|-----|--------|----------------|-------|
| TCsat42 | 10   | 107 | Gypsy-7_TCa-I | 872  | 968 | c   | 0.7113 | 1.8462         | 240   |

||:|:|||||||:|--||| ||||| ||:|:|:|:| |||----||| ||:-||| |||

## SatD

| Source  | From | To  | Release  | From | To  | Size | Size   | Pos./Min/Max | Score |
|---------|------|-----|----------|------|-----|------|--------|--------------|-------|
| TCsat43 | 60   | 139 | ARNOLDY2 | 424  | 501 | c    | 0.7595 | 1.7500       | 209   |

||||:||||| --- ||||-:||||:~:| | |||| ||||||||:||||||| : |||-||||:|

## SatDM

| Dataset | From | To  | Release     | From | To   | Size | Size   | Frequency | Score |
|---------|------|-----|-------------|------|------|------|--------|-----------|-------|
| TCsat45 | 190  | 227 | COPIA3-I MT | 4552 | 4589 | c    | 0.8421 | 1.2000    | 222   |

|||:|||||:|:|||||    ||||:|:|||||

## Sat DM

| Substrat | From | To  | Rebase      | From | To  | Dist | Dist   | Pos./min/100 | Score |
|----------|------|-----|-------------|------|-----|------|--------|--------------|-------|
| TCsat47  | 6    | 138 | hAT-N20 ALy | 185  | 314 | d    | 0.7597 | 2.4444       | 211   |

| | | : | | |    | --- | | | :: | | |   - | | | | | | | | | | - | | - | | | | :: ---- | | | | | |        ----

69 TTTCTAAATAAGTTGTTACATCTGTTCTTTATTTTTATCAATCATTTTAATAATCTG--AT-TAATAAT 135

|||:| |||| ||:|||---:| |||| |||||:| || |||| || || |||| --|-||| |||||

245 TTTTAAATATTTATTAC---TATTATTTAAATTTATTAATAATTTTATTATCTTTATATAATAAT 311

136 AAT 138  
|||  
312 AAT 314

TCsat48

| SatDNA  | From | To  | Repbase       | From | To  | Dir | Sim    | Pos/Mm:Ts | Score |
|---------|------|-----|---------------|------|-----|-----|--------|-----------|-------|
| TCsat48 | 57   | 136 | Polinton-2_HM | 130  | 211 | d   | 0.7317 | 1.3846    | 216   |

57 TAAGAAAAGAAAAGCTTAATCTTGTTTTACTCAAA--TGACACTATTTTTATAGAAAAAATGCTTAAAA- 123  
|||:||||:|||| | ||||:|-| ||||:|:| | --|:|:-||| : ||||:| ||||| |:| ||||-  
130 TAAAAAAAAAAAAAGATTAATTTT-TTTTGTTTAAAGTTAAT-CTAGCGTTATAAAAAAATATATAAAAA 197  
  
124 -GCAAACGATTTTT 136  
-||| |:| |||||  
198 AGCAAATGCTTTTT 211

TCsat49

| SatDNA  | From | To  | Repbase         | From | To   | Dir | Sim    | Pos/Mm:Ts | Score |
|---------|------|-----|-----------------|------|------|-----|--------|-----------|-------|
| TCsat49 | 47   | 132 | Gypsy-6B_AlBr-I | 4605 | 4687 | c   | 0.8148 | 3.0000    | 240   |

47 TATTGGTTTT---AATTAATTAA-----ATAATTAATTGACGTTGGAAGAGTTATTTTACATTTATAATC 108  
||:| |||||---| ||||| |||||----| ||| -||| -||| || |||-----| || | |:| ||| -  
4687 TACTTGTTTTGTAAATTAATTAATACTACTATAAG-AATT-ACGTTGTAAGA-----TACTTTTGTAAT- 4628  
  
109 GATATTTTCTTAAGACAAGTAAGC 132  
-||| |:| ||||| |||||  
4627 -ATAGTCTCTTAAGACTAGTAAGC 4605

| SatDNA  | From | To  | Repbase    | From | To  | Dir | Sim    | Pos/Mm:Ts | Score |
|---------|------|-----|------------|------|-----|-----|--------|-----------|-------|
| TCsat49 | 175  | 261 | hAT-26_DTa | 334  | 406 | c   | 0.7867 | 2.8000    | 219   |

175 TTAATAAATATTAACAAAAAACAGTTTTTGAGTGAACCTTACACTCGAATTTTGAACAAATAGTAAAC 244  
| ||||| -| ||||| |||||----| ||||:| |:| |:| | | ||| | | |:|  
406 TTAATAAAT-ATTAACAAAAAA-----ATCTTTATACTTGCATCTGGTTCAAAAAGATAAGC 351  
  
245 AAAAAATTTATTTTTTTT 261  
| |||| | |:| |||||  
350 AAAAAATATATTCTTTTT 334

TCsat50

| SatDNA  | From | To  | Repbase        | From | To   | Dir | Sim    | Pos/Mm:Ts | Score |
|---------|------|-----|----------------|------|------|-----|--------|-----------|-------|
| TCsat50 | 12   | 105 | Gypsy-45_PAb-I | 3823 | 3921 | d   | 0.8065 | 1.8000    | 215   |

12 TTTGACAACTTACTATTTAAGAAACA-----TAAATTAA----TCACAATCTGTTATACTTAAAAAAA 72  
|||:| |:| | |||||----| ||||-----| |:| |:|----| | -||| | -| |||-----| |||||  
3823 TTTAACGAACATACTATT-----AAACAATTGTCAAATTGACATATCA-AATCT-TGATAA-----AAAAAA 3882  
  
73 ATTAAAAAT-GTCCTT----AGGTAACAAA-TTATTTAC 105  
| ||||| -| | | -| -:| ||||| -| |||||  
3883 TTTAAAAATAGTCATTGGAAAGATAACAAATTATTTAC 3921

TCsat51

| SatDNA  | From | To  | Repbase        | From | To  | Dir | Sim    | Pos/Mm:Ts | Score |
|---------|------|-----|----------------|------|-----|-----|--------|-----------|-------|
| TCsat51 | 59   | 143 | Gypsy-671_AA-I | 292  | 373 | d   | 0.7619 | 3.0000    | 211   |

59 ATAAAAACTTG-GTAAATTGACTTCGCTTATTTAT-TCAGTGAT-ATCTTCGTAATTACTAAGTTTATG 125  
| |||| | | | -:| |:| |:| |----| ||| | |||| -| | ||||| -| | | |:| | |----| |||| | | |  
292 ATAAAACCGTAAGTAGAATTAA-----GCTTTTTTATATAAGTGATTATCAGAGTGATT--TAAGTGAATG 355

126 ATCAAAATAATAACATAT 143  
|||||||:| |||  
356 ATCAAAATAACAAATAT 373

| SatDNA  | From | To  | Rebase     | From | To  | Dir | Sim    | Pos/Mm:Ts | Score |
|---------|------|-----|------------|------|-----|-----|--------|-----------|-------|
| TCsat51 | 170  | 243 | MuDRx-3_TV | 699  | 768 | c   | 0.7639 | 2.0000    | 221   |

170 AGAAAAGCTTAATTTTAACC-CAATTTTATGTTTTATTTTATTAATACAAATTTTCGAATTTATTATTTA 238  
||||||| ||||| :|-|||||||:||||:||||| | -| :|||:|||||----| ||:|||| ||  
768 AGAAAAGCTTTATTTTTTCTCAATTTTAAATTCATTTTCAGTC-TCTAAACTTTC ----- TTACTATGTA 704  
239 AAAAC 243  
|||||  
AAAAC 699

| SatDNA  | From | To  | Rebase            | From | To   | Dir | Sim    | Pos/Mm:Ts | Score |
|---------|------|-----|-------------------|------|------|-----|--------|-----------|-------|
| TCsat51 | 255  | 335 | Helitron-N60B_CGi | 3066 | 3153 | d   | 0.7765 | 2.6000    | 223   |

255 AGCT-TCAC TTATTTA----TCAACCGATATCTTAAAAAT-TACTCAATTTATGGCTAAACTAA---TTA 315  
||||-| |||| | |||----||| ||||| -||||||| -| :|||:||||| |:| |:| |||--- ||  
3066 AGCTGTAAC TTTTTTACCTTTCATCCGATAT-TTAAAAATCTTTTCAGTTTATTGTTAGATAAAGAGTA 3134  
316 CAGATTTAAAAAATATGATC 335  
||-||||||| ||||:|  
3135 CA-ATTTAAAAATTATGGTC 3153

TCsat52

| SatDNA  | From | To | Rebase        | From | To  | Dir | Sim    | Pos/Mm:Ts | Score |
|---------|------|----|---------------|------|-----|-----|--------|-----------|-------|
| TCsat52 | 4    | 35 | Academ-10_LMi | 666  | 697 | c   | 0.9062 | 1.5000    | 225   |

4 TTTGTAGAGAATTTTATTGTCTTTAATTTTGT 35  
||||||| |||||:|:|||||||  
697 TTTGTAGACAATTTTGTCTTTAATTTTGT 666

TCsat53

| SatDNA  | From | To  | Rebase     | From | To   | Dir | Sim    | Pos/Mm:Ts | Score |
|---------|------|-----|------------|------|------|-----|--------|-----------|-------|
| TCsat53 | 9    | 140 | MuDR-2_GAr | 3549 | 3679 | c   | 0.7405 | 1.9231    | 233   |

9 TTTTTTCAGTTATATTTTATTCTTTTTAGTTTCTCGGGCATTTA--TTGTTTTATTTTCTC--TTAATC 74  
|:||||| ||| |||| | |:||||:| :|||-----| |||--||: |||-|||||||--|| ||:  
3679 TCTTTTCATTTAAATTTAAATTTTTTCTCATTTTC----- ATTTAAATTAATTT-TTTTCTCATTTTCATT 3617  
75 TCGGTT-ATTTTACTTTGCAGTTTTTAAGTTAAACTTCTCAT--GGTTTAGACT--ATTTTTTTCTCATT 139  
| :||-|||| | |||-|--||||| ||||:|:||||-- :|||:|:|-- |||||  
3616 TAAATTTATTTTCTTT-CA--TTTAAATTTAAATTTTTCATTTTCATTTAAATTTANTTTTTTCTCATT 3550  
140 T 140  
|  
3549 T 3549

TCsat54

| SatDNA  | From | To | Rebase     | From | To  | Dir | Sim    | Pos/Mm:Ts | Score |
|---------|------|----|------------|------|-----|-----|--------|-----------|-------|
| TCsat54 | 12   | 68 | HARB-N1_TC | 819  | 876 | c   | 0.7931 | 2.0000    | 209   |

12 ACAAATA--TTTGATTAATAATGAGAAATAGGTGAAAATCAAGCGAATAAAAAATGAA 68  
|:|||||--||| ||||:|||||:| ||||:|-||||||| ||| |||| ||||  
876 ATAAATAATTTTTATTGAATAATAATAATAAAT-AAAATCAAGAGAAAAAATTGAA 819

| SatDNA  | From | To  | Rebase                           | From | To  | Dir | Sim    | Pos/Mm:Ts | Score |
|---------|------|-----|----------------------------------|------|-----|-----|--------|-----------|-------|
| TCsat54 | 166  | 264 | <a href="#">Gypsy-122_NS-LTR</a> | 147  | 237 | c   | 0.7660 | 1.7778    | 232   |

```

166 CGTACAATTTTTTTATTATTCTTTGGAAATTTTGCAAAACAATCTTGATTGAGTTATTGTAGAAA--- 232
    ||||| | ||||| ||::||:----|||:||||| |||:-||:|:-|||----|||---
237 CGTACATTATTTTATGATTTTTTC----ATTTGTAAAACAACTTA-ATTAAAT-ATT---AAACGC 178

233 AAATAACGACAGTTTTTTGTATTTTTTTTTTAA 264
    |||:-|||| ||||:||||| |||
177 AAATG-CGACATATTTTATATTTTTTATTAA 147

```

| SatDNA  | From | To  | Rebase         | From | To  | Dir | Sim    | Pos/Mm:Ts | Score |
|---------|------|-----|----------------|------|-----|-----|--------|-----------|-------|
| TCsat54 | 265  | 309 | Gypsy-27_DW1-I | 295  | 333 | c   | 0.8500 | 2.5000    | 201   |

265 ATTTTGACTTTTATTTTACCAAAAAATATTGTTTCTTATTTAAGA 309  
 |||||:| |||||-----|| |:| |||||  
 333 ATTTTGATTGTATTTTA-----AATTCGATTCTTATTTAAGA 295

## TCsat55

| SatDNA  | From | To  | Rebase   | From | To   | Dir | Sim    | Pos/Mm:Ts | Score |
|---------|------|-----|----------|------|------|-----|--------|-----------|-------|
| TCsat55 | 146  | 309 | DNA-1_CQ | 1390 | 1543 | d   | 0.7421 | 1.6471    | 275   |

```

146 AAAATTT--AAGATT-CTAAATTT-CAAAATATGTACCCAAAGTTTTCGAAACTTTAGACTTGAACATGT 211
   |||||---||:|||-|||||||---| ||| |---|:||||--||| |||:|----|||:|:| | |
1390 AAAATTTCTAAATTTCTAAATTTCTAAATTT---CTTAAA--TTTCTAAATTT-----CTTAAATTTCT 1450

212 GAACTT-TGAAACTTCTAAACTTCTAAATAACTAAAACTTGAAGATCTAAAGTTTC-AAAGTTGTTCTAA 279
   :||:|-|:||||:|||||||:||||||| || |||:|-----| |||:||||-||:| |--|||
1451 AAATTTCTAAATTTCTAAATTTCTAAATTTCTTAAATTT-----CTAAATTTCTAAATTT--TCTAA 1512

280 G-TTTC-AAGATTAGGTACAATTTCTAAGATT 309
   :-||||-||:|||- || ||||| |||:||
1513 AATTTCTAAATTT-TCTAAATTTCTAAATTT 1543

```

## TCsat56

| SatDNA  | From | To  | Rebase          | From | To   | Dir | Sim    | Pos/Mm:Ts | Score |
|---------|------|-----|-----------------|------|------|-----|--------|-----------|-------|
| TCsat56 | 191  | 244 | Harbinger-21_OS | 1503 | 1558 | c   | 0.8182 | 1.4000    | 258   |

191 CATTAAATTATTTTACCAAGCATTTAC---AATAATTTACTCAGAAGATGTCTATT 244  
|||:|||||: |||||:| |--|---|||---|||---|||:|||||:|||  
1558 CATTGAATTATTCAACCAAGCACTGACCTAAAATA-TTTA-TCAAAAGATGTTTATT 1503

**B)**

| Repeat Class                   | Fragments | Length (bp) |
|--------------------------------|-----------|-------------|
| <b>Transposable Element</b>    | <b>37</b> | <b>2955</b> |
| <b>DNA transposon</b>          | <b>27</b> | <b>2267</b> |
| Academ                         | 2         | 60          |
| Dada                           | 1         | 78          |
| EnSpm/CACTA                    | 2         | 209         |
| Harbinger                      | 2         | 111         |
| Helitron                       | 2         | 150         |
| Mariner/Tc1                    | 2         | 157         |
| MuDR                           | 6         | 584         |
| Polinton                       | 1         | 80          |
| Sola                           | 1         | 66          |
| Sola1                          | 1         | 66          |
| Transib                        | 2         | 224         |
| hAT                            | 3         | 280         |
| piggyBac                       | 1         | 67          |
| <b>LTR Retrotransposon</b>     | <b>9</b>  | <b>659</b>  |
| Copia                          | 1         | 38          |
| Gypsy                          | 8         | 621         |
| <b>Non-LTR Retrotransposon</b> | <b>1</b>  | <b>29</b>   |
| L1                             | 1         | 29          |
| <b>Total</b>                   | <b>37</b> | <b>2955</b> |

**C)**

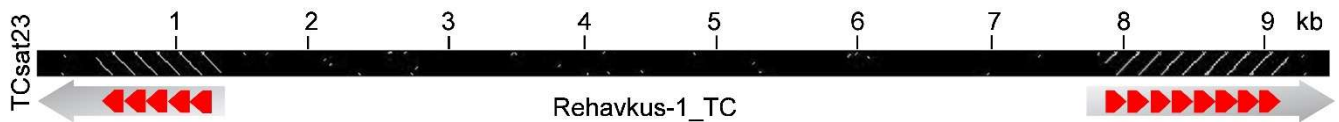

**Figure S2.** Similarities between *T. castaneum* low-copy satDNAs and Repbase entries (release 27.09) accessed by the software CENSOR. **A)** Alignments of partial sequence segments between *T. castaneum* low-copy satDNAs and Repbase-deposited repetitive elements. **B)** A report classifying all repetitive elements in Repbase with which the *T. castaneum* low-copy satDNAs share partial similarity. **C)** A dot-plot sequence comparison showing TCsat23 monomers (red arrows) repeated in the inverted termini (grey arrows) of Rehavkus-1\_TC DNA transposon.
